# Supplementary material
Source: PubMed Central journal article supplement (PMC4151304)

## **Development of Carbocyanine Dyes for PRMT Inhibition and Imaging**

Sarmistha Halder Sinha,<sup>1</sup> Eric A. Owens,<sup>1</sup> You Feng,<sup>1</sup> Yan Xie,<sup>2</sup> Yaping Tu,<sup>2</sup> Maged Henary,<sup>\*1</sup> Y. George Zheng<sup>\*1</sup>

<sup>1</sup> Department of Chemistry, Georgia State University, PO Box 4098, Atlanta, Georgia 30302.

<sup>2</sup> Department of Pharmacology, Creighton University, 2500 California Plaza, Omaha, NE 68178

- Correspondence should be addressed to: [mhenary1@gsu.edu](mailto:mhenary1@gsu.edu) or [yzheng@gsu.edu](mailto:yzheng@gsu.edu)

### **NMR and Mass Spectrometry Data of Synthesized Compounds**

7.90  
7.78  
7.77  
7.68  
7.67  
7.66  
7.36  
7.35  
7.28  
7.27  
7.26

4.87  
4.50  
4.57  
4.55

3.35  
2.96  
2.94  
2.92  
2.81  
2.39  
2.37  
2.35  
2.33

1.82

### Compound 18

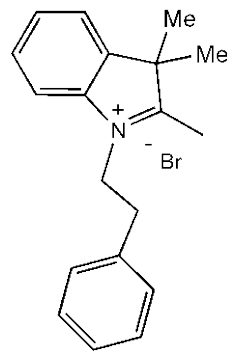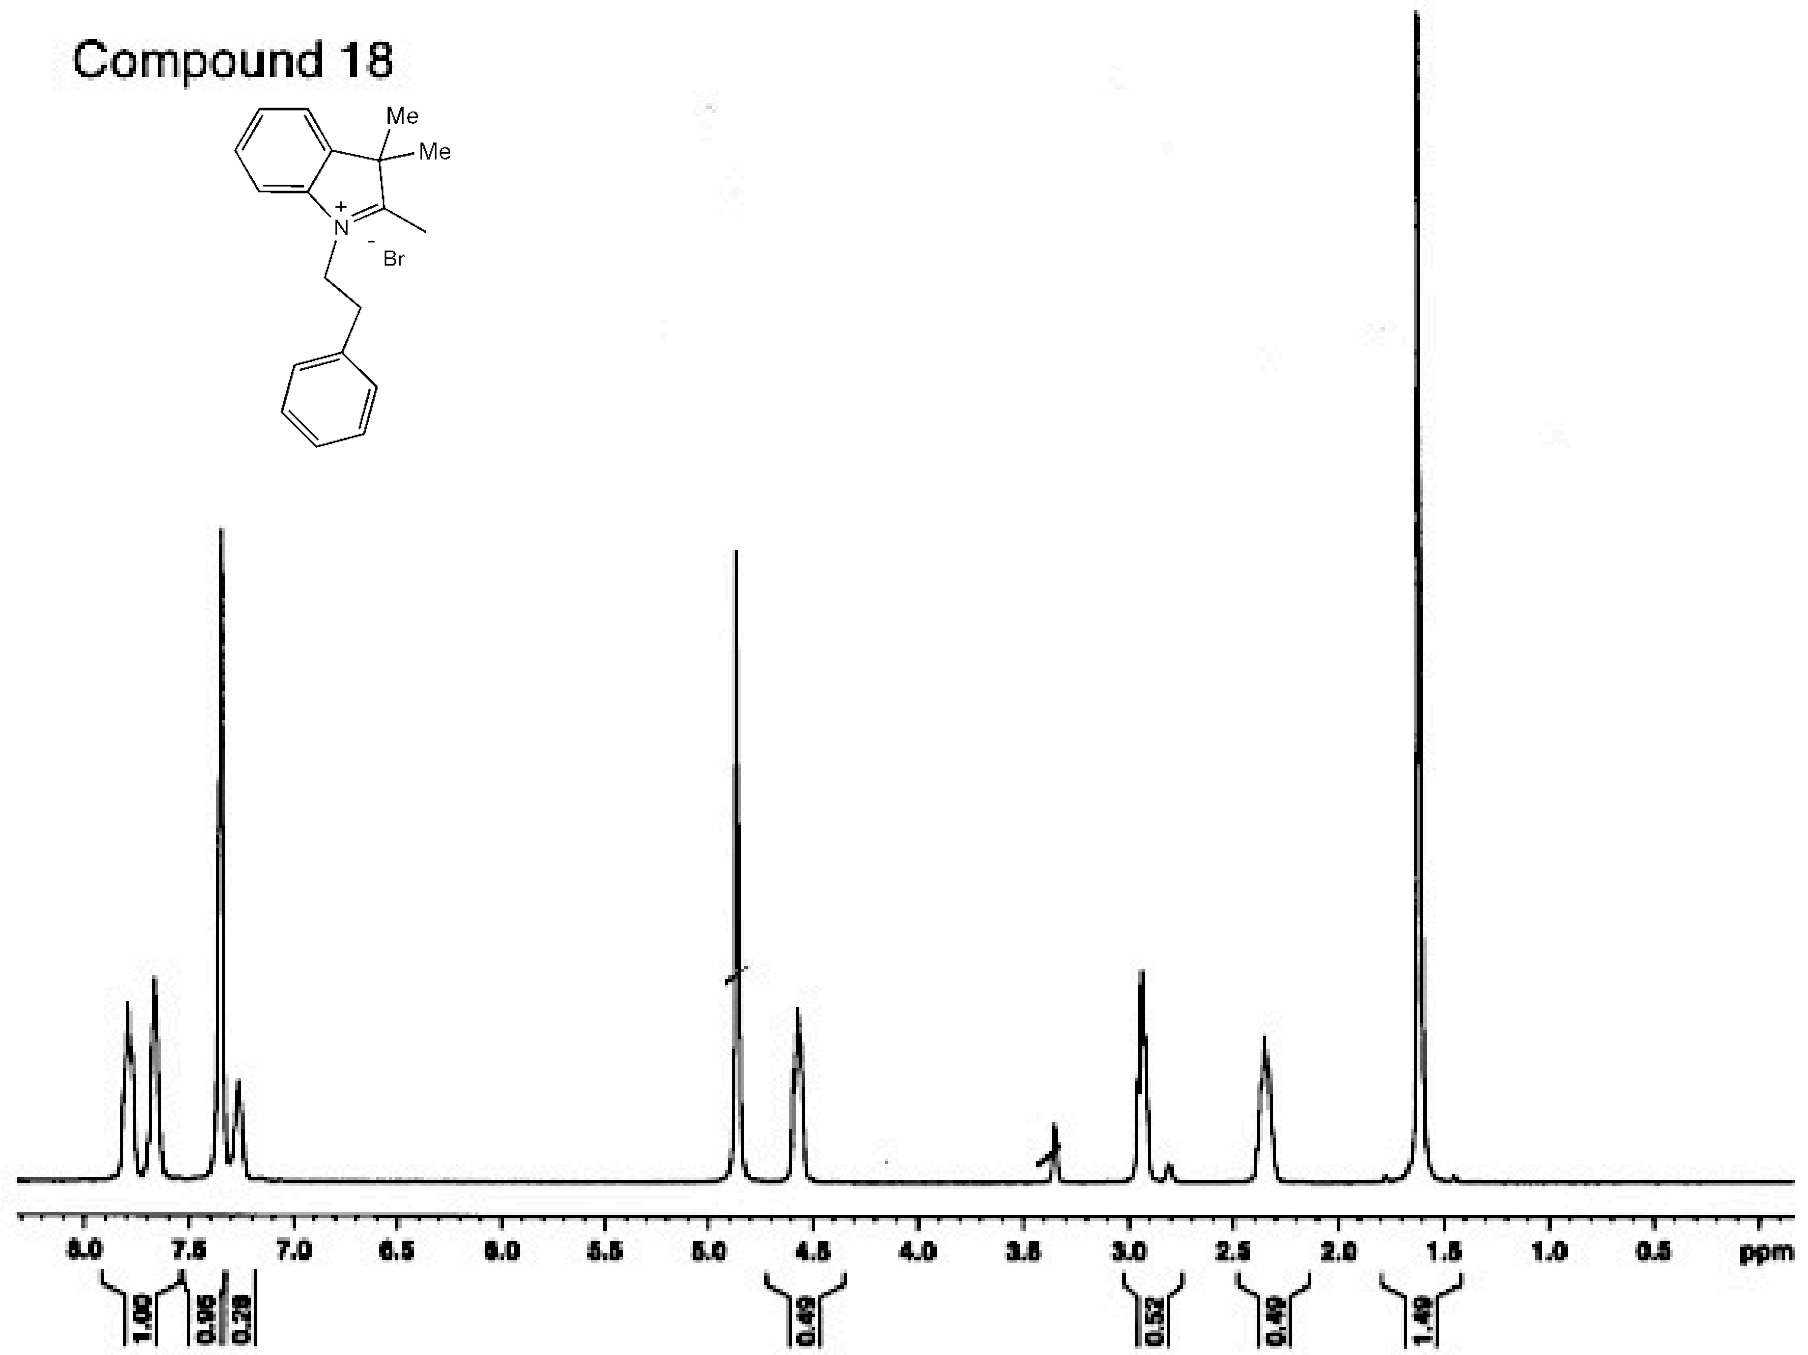

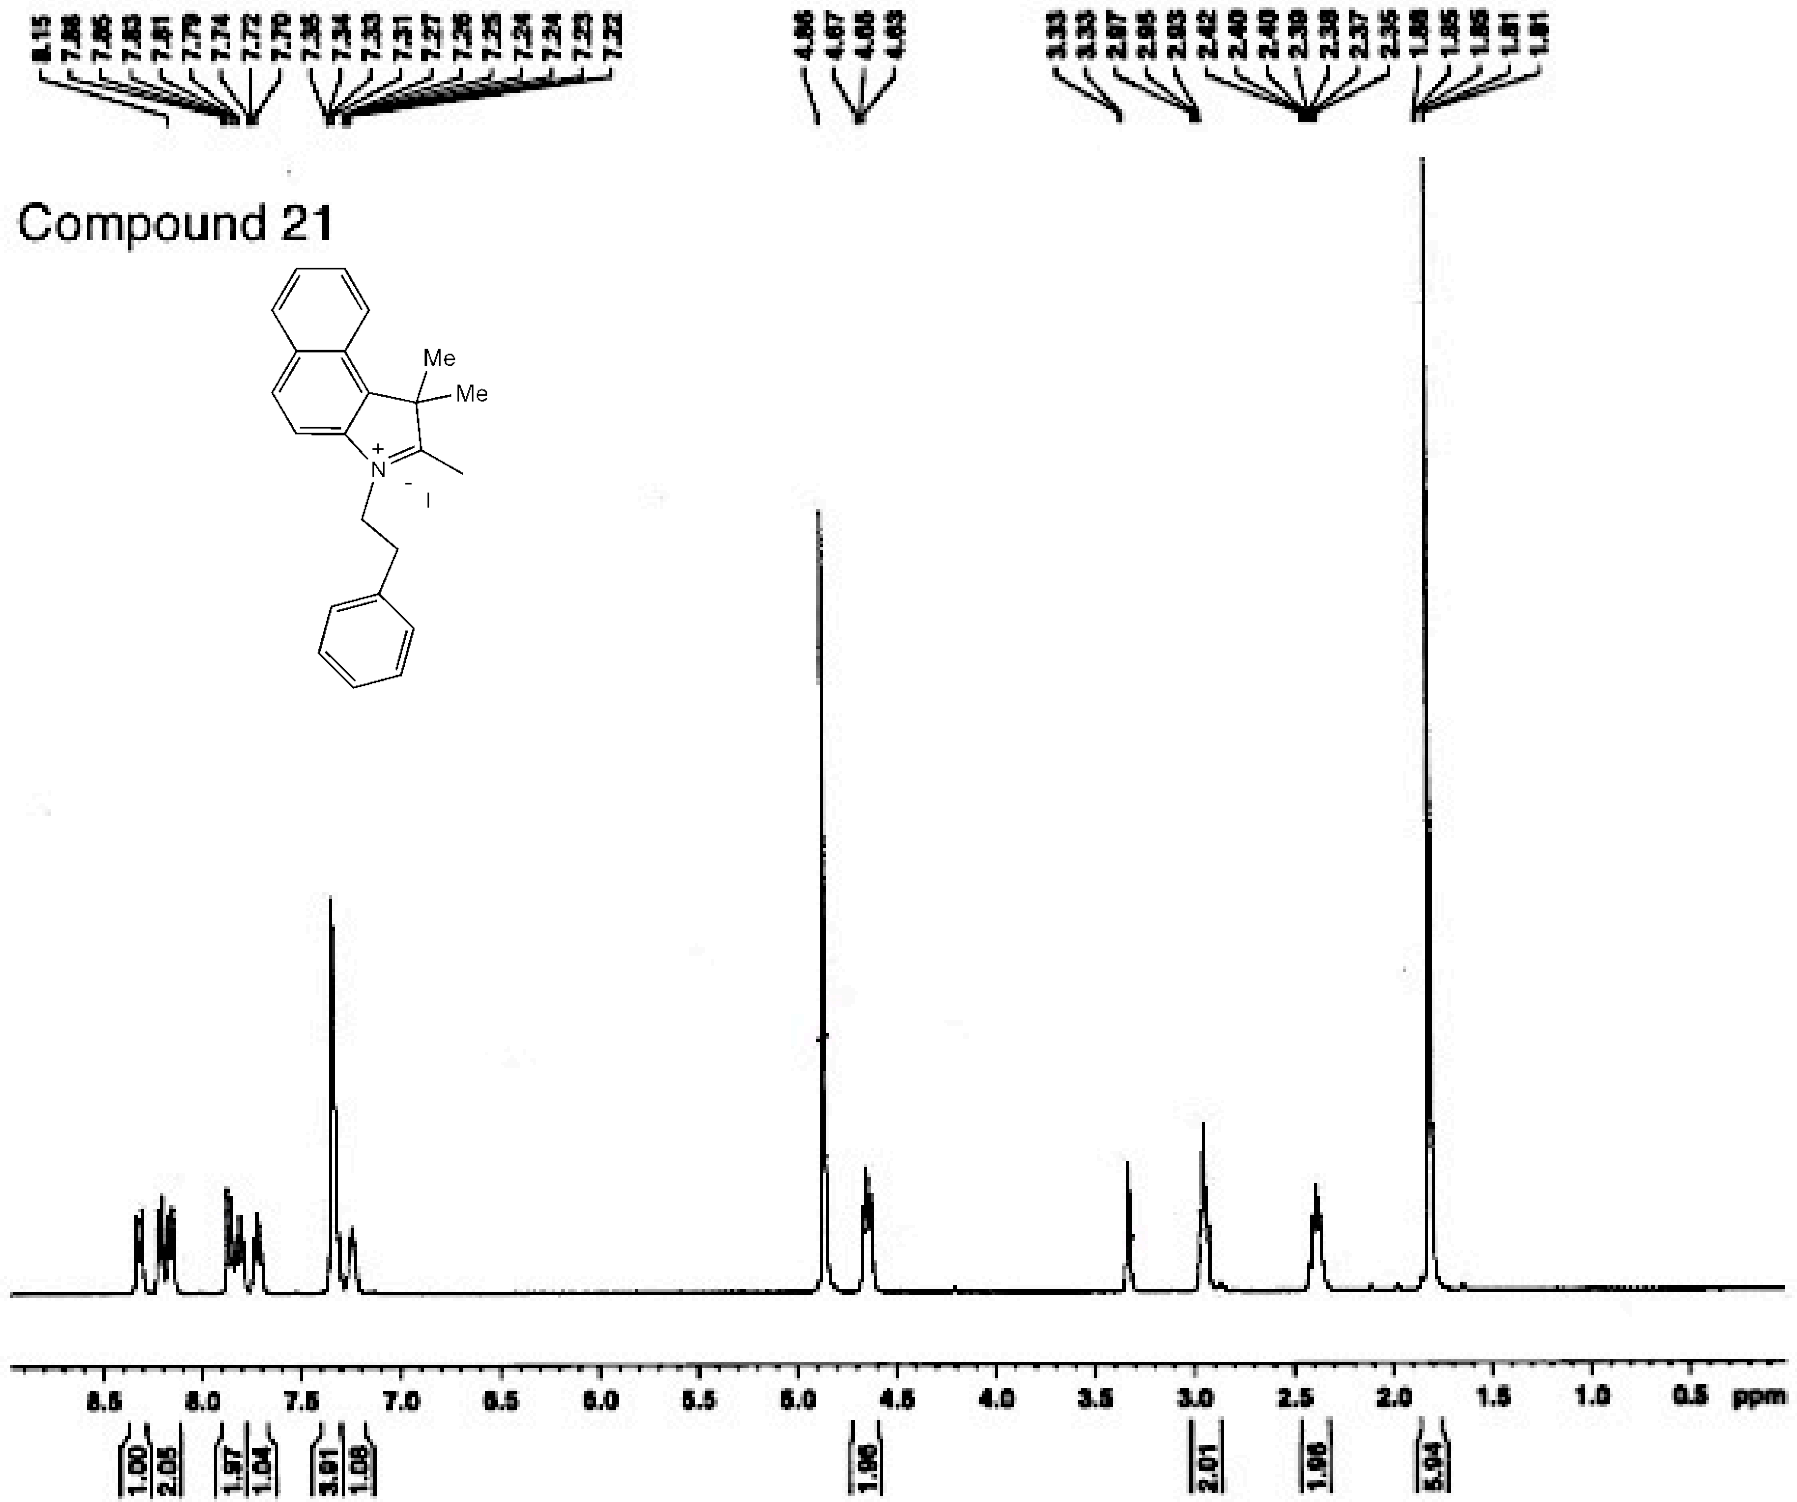

Compound 21

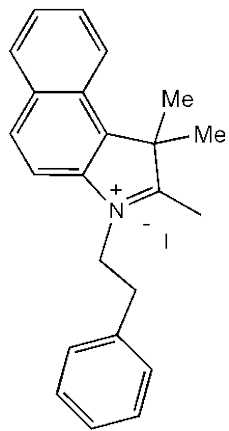

MHI-21

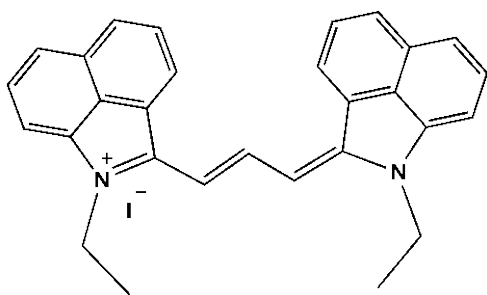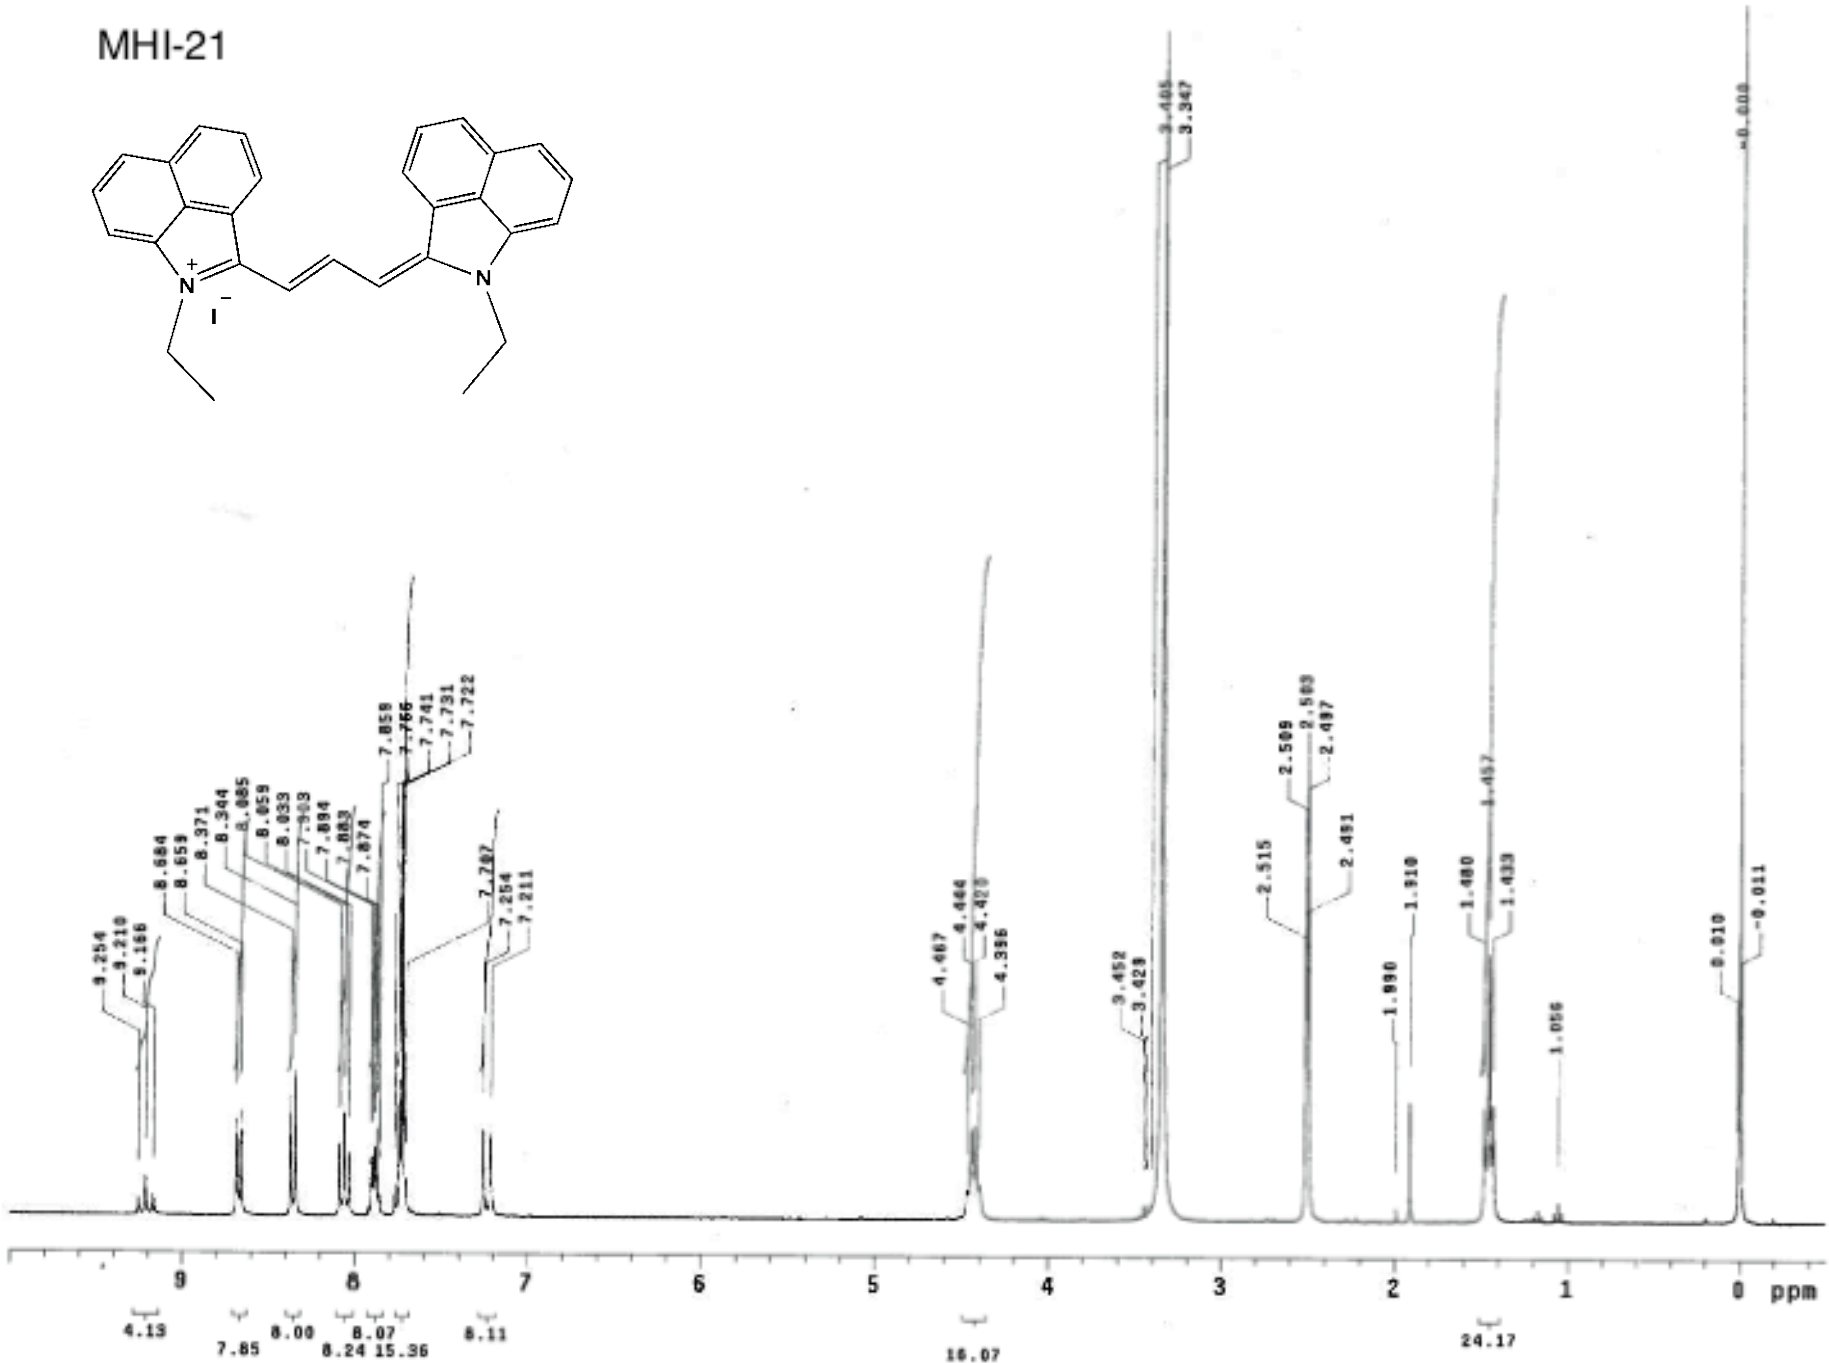

MHI-06

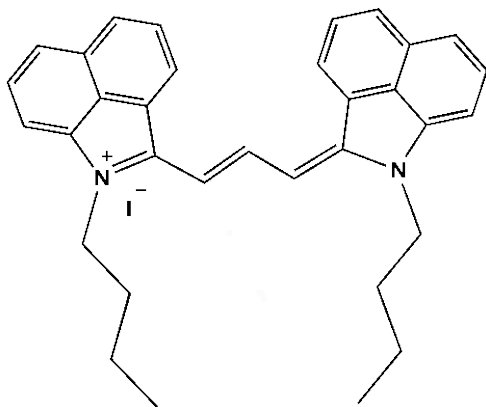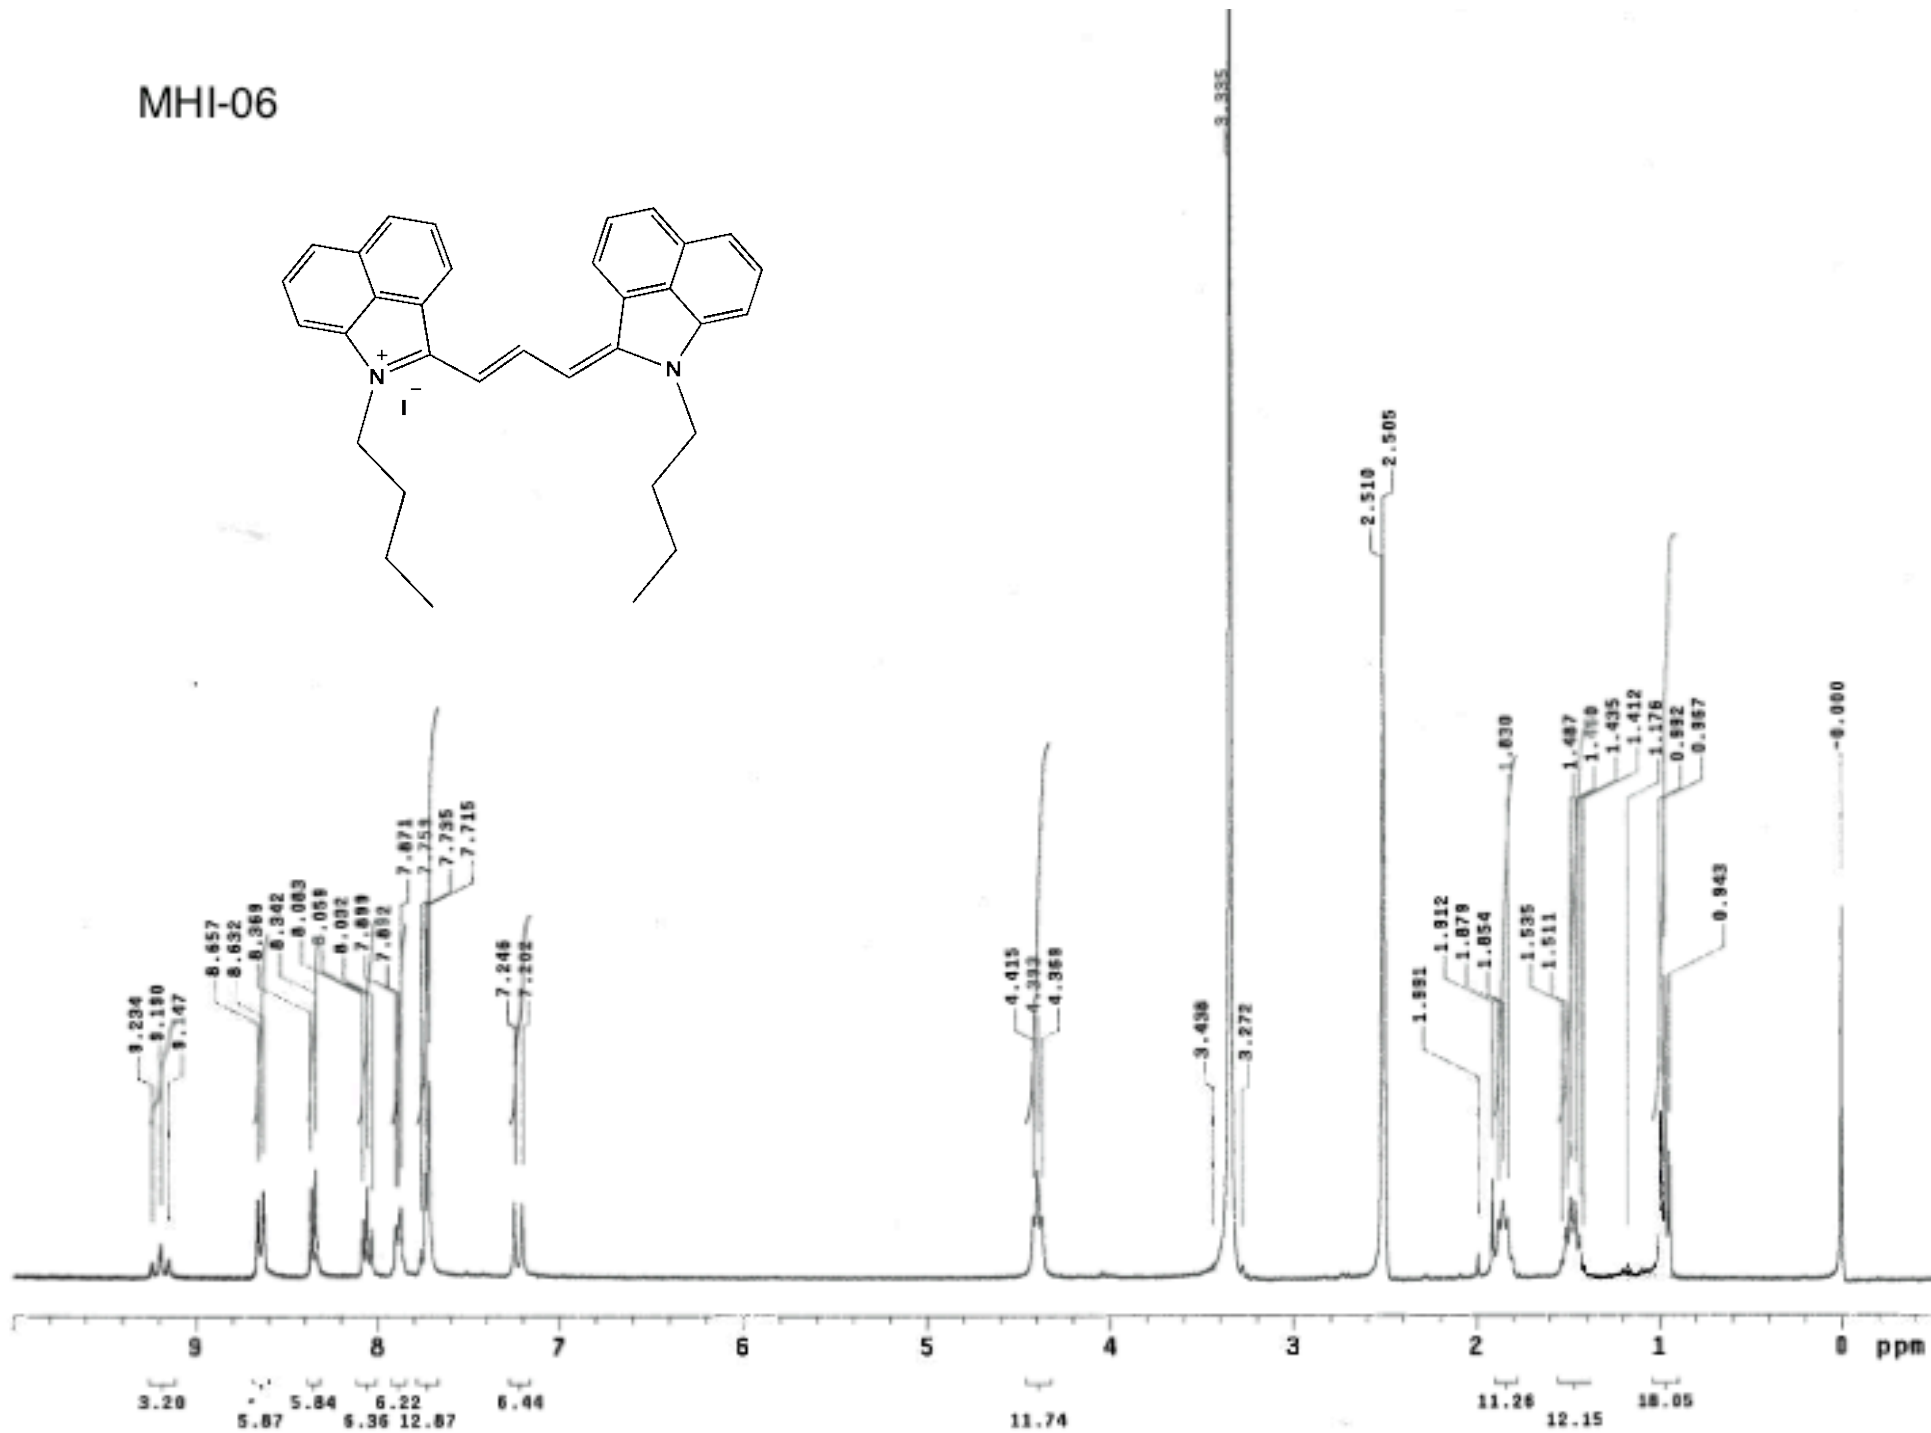

MHI-36

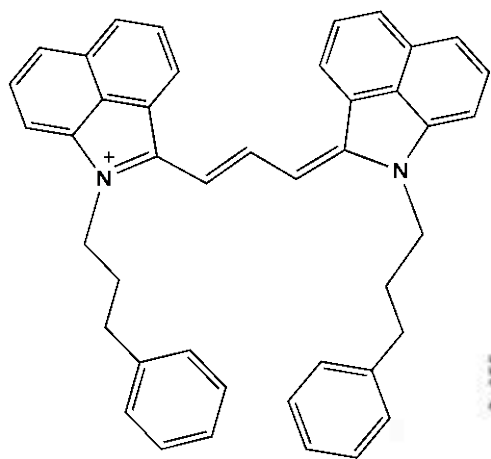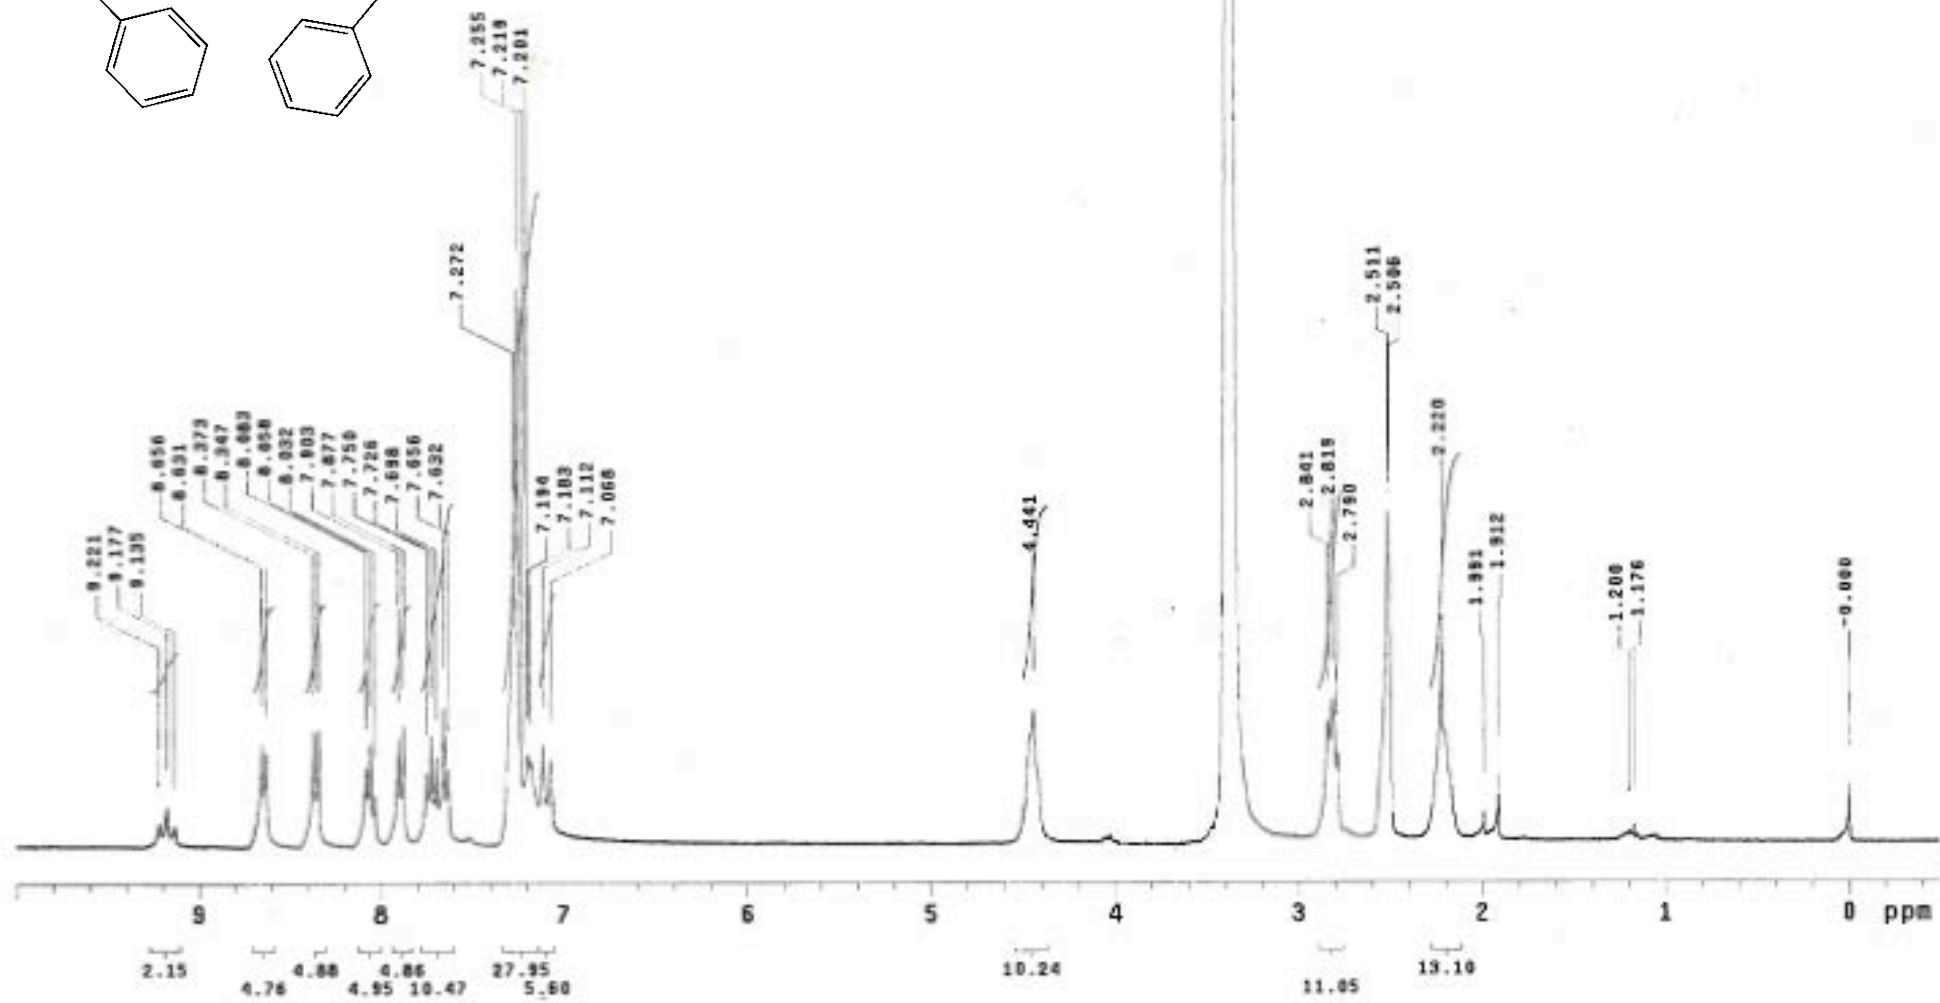

E-14

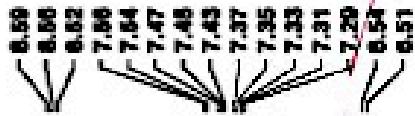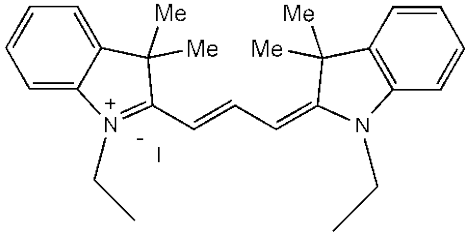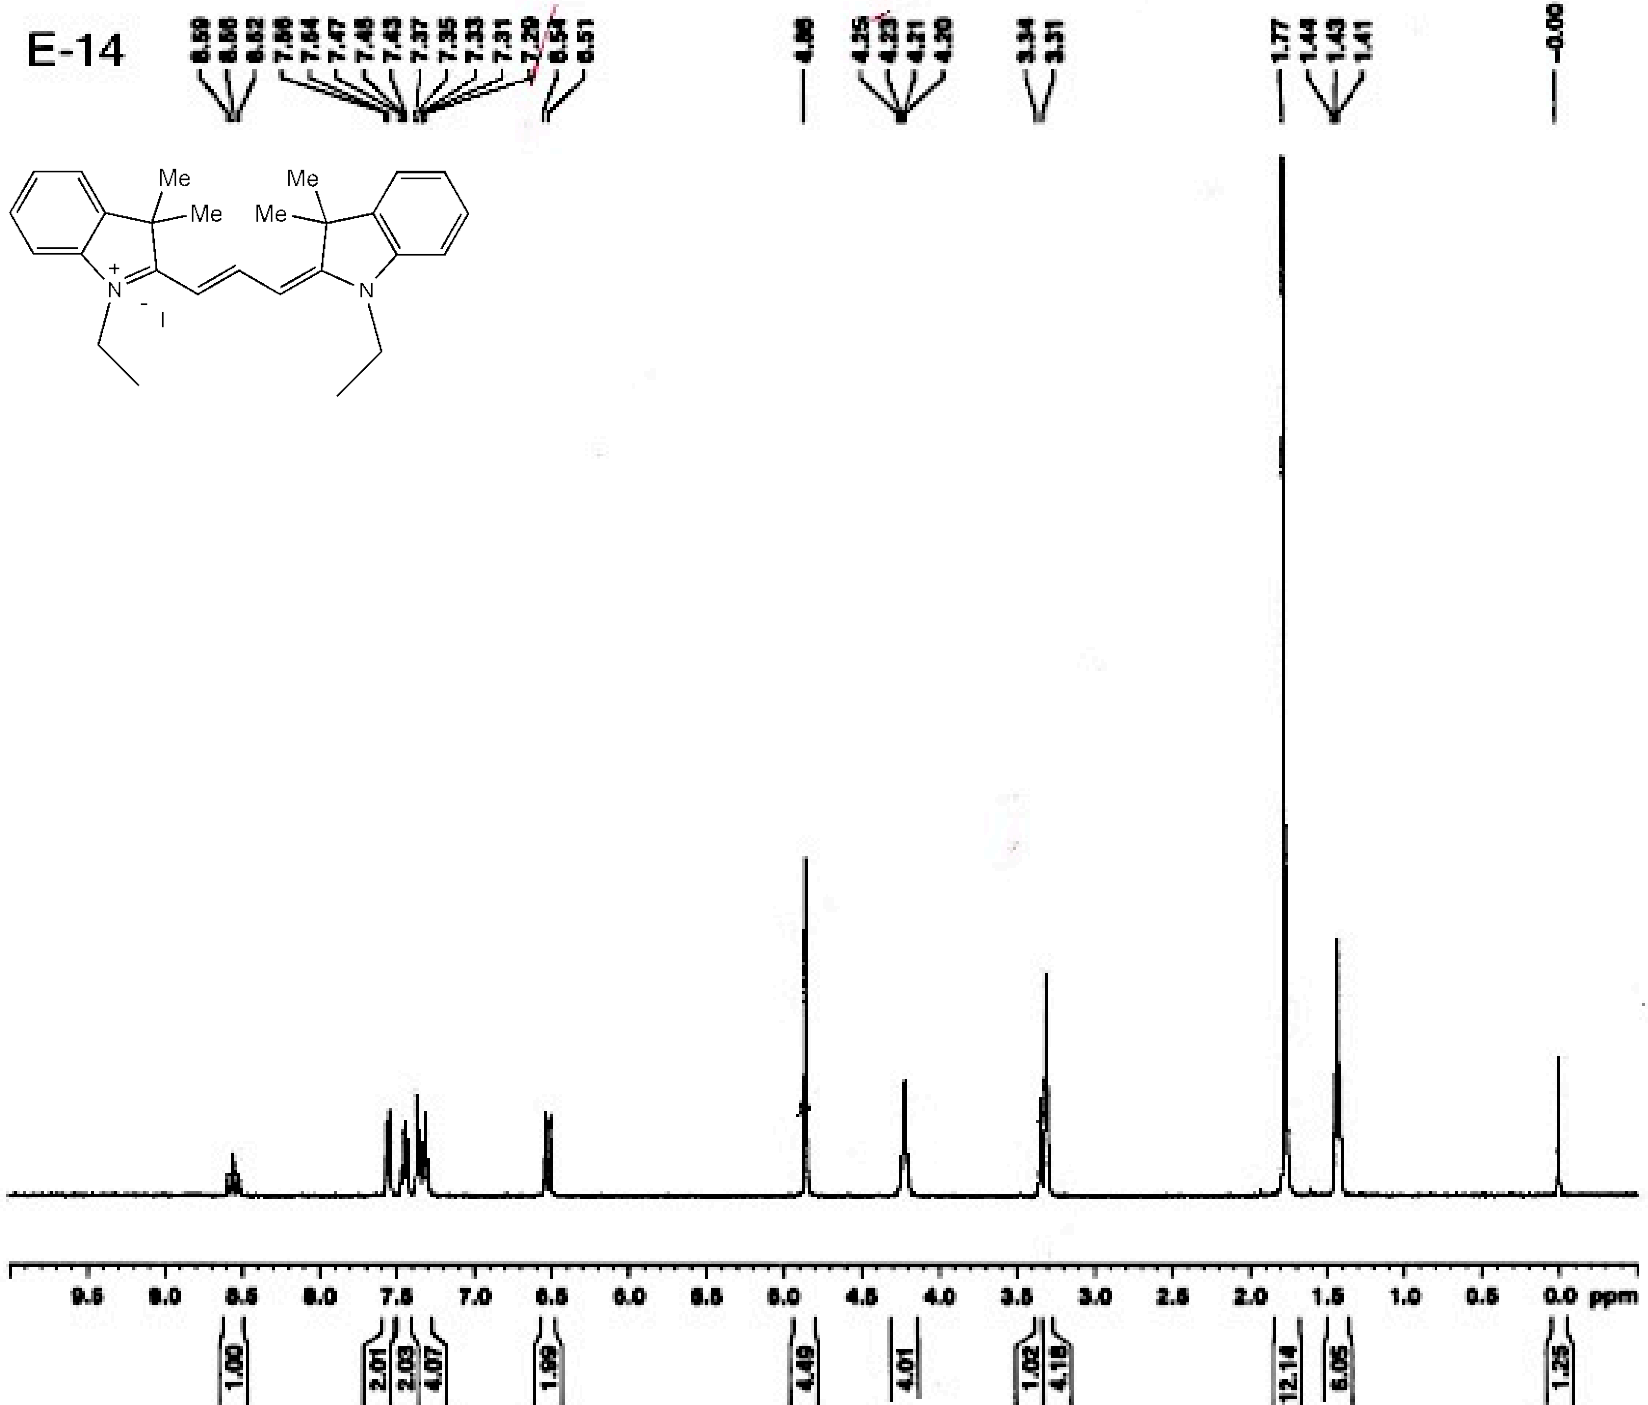

E-14

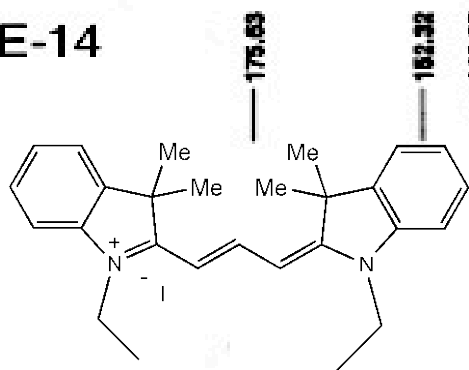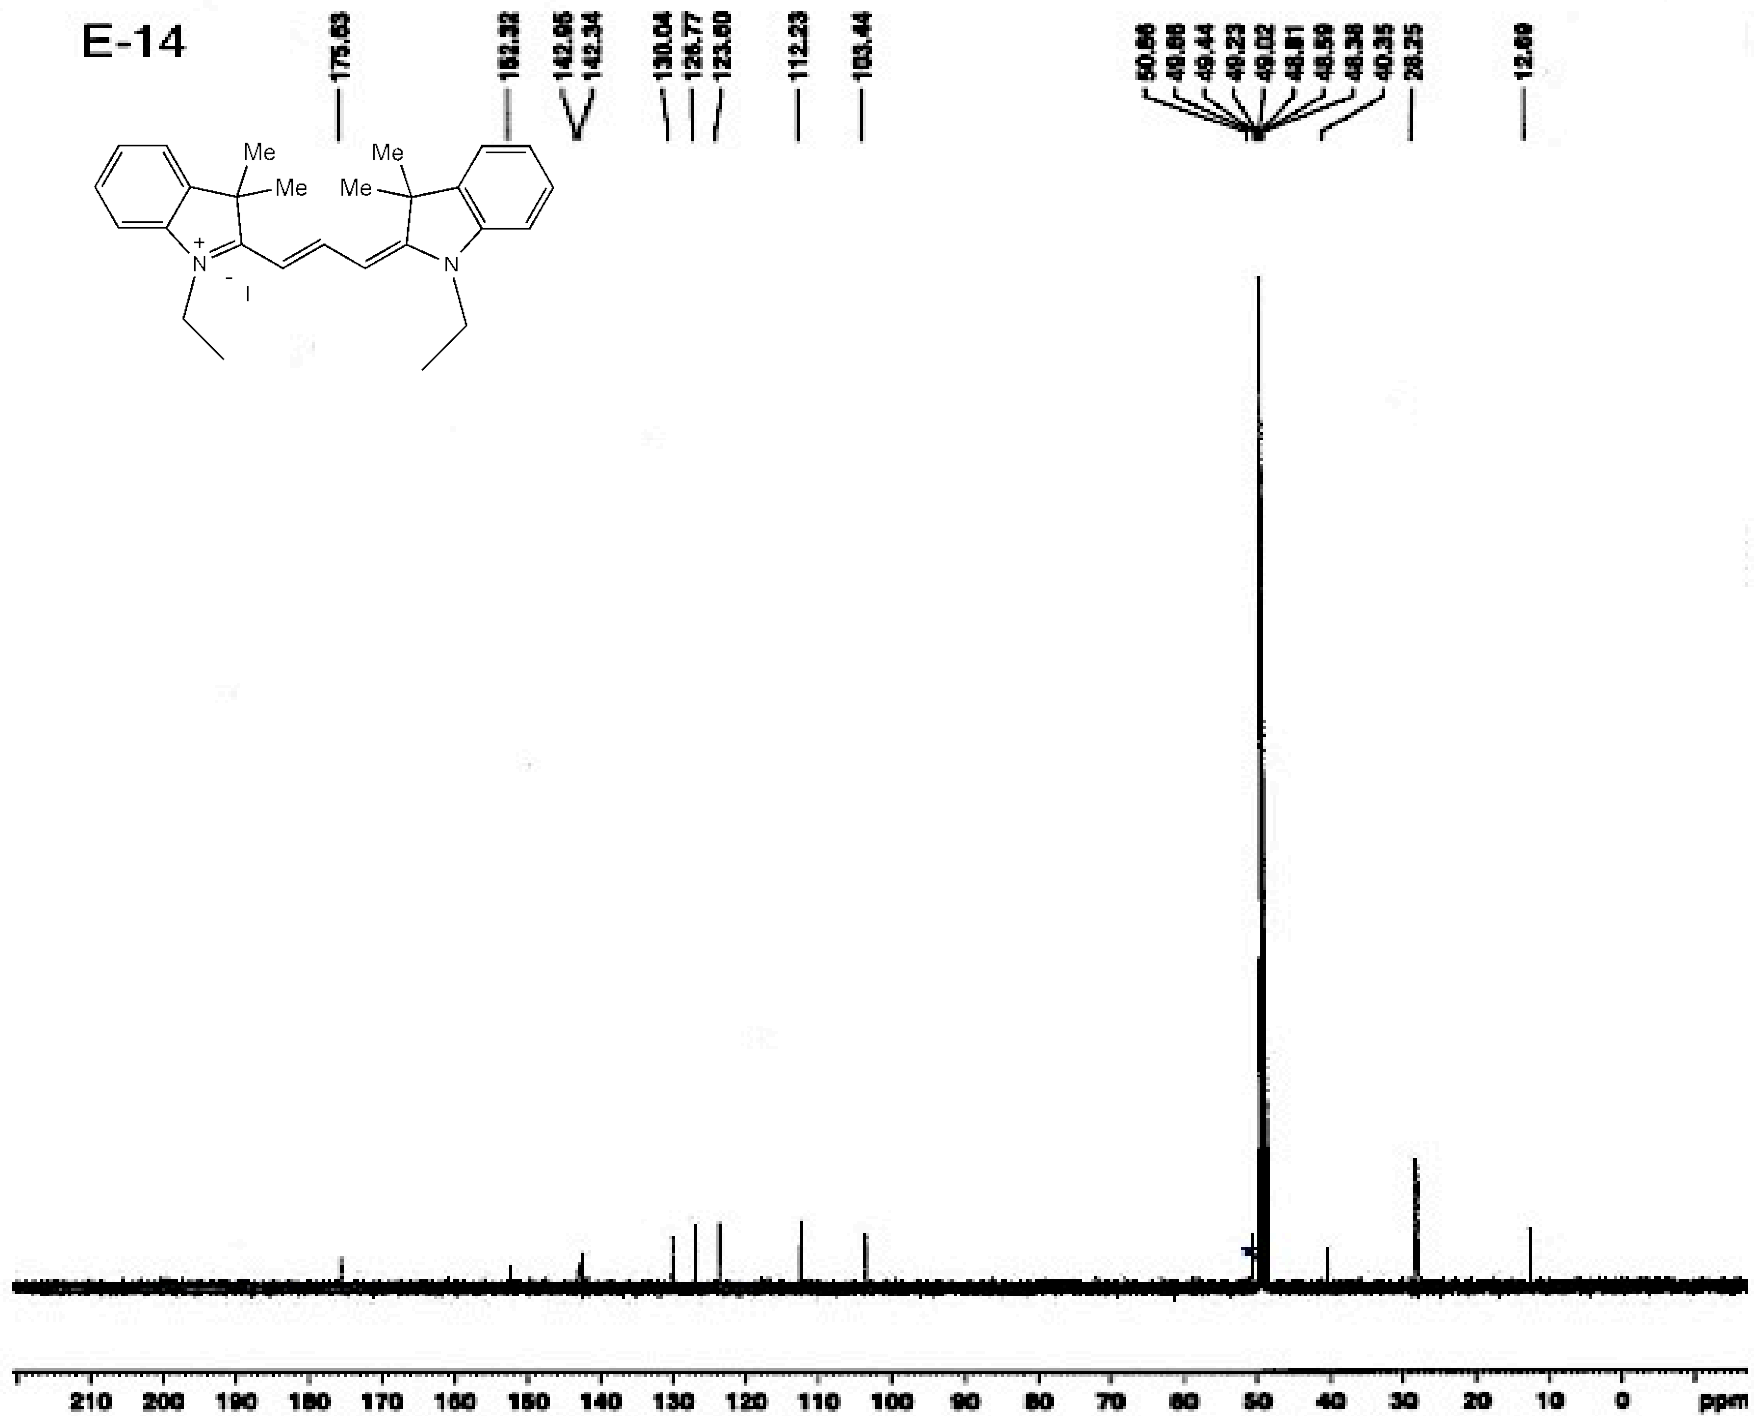



E-14

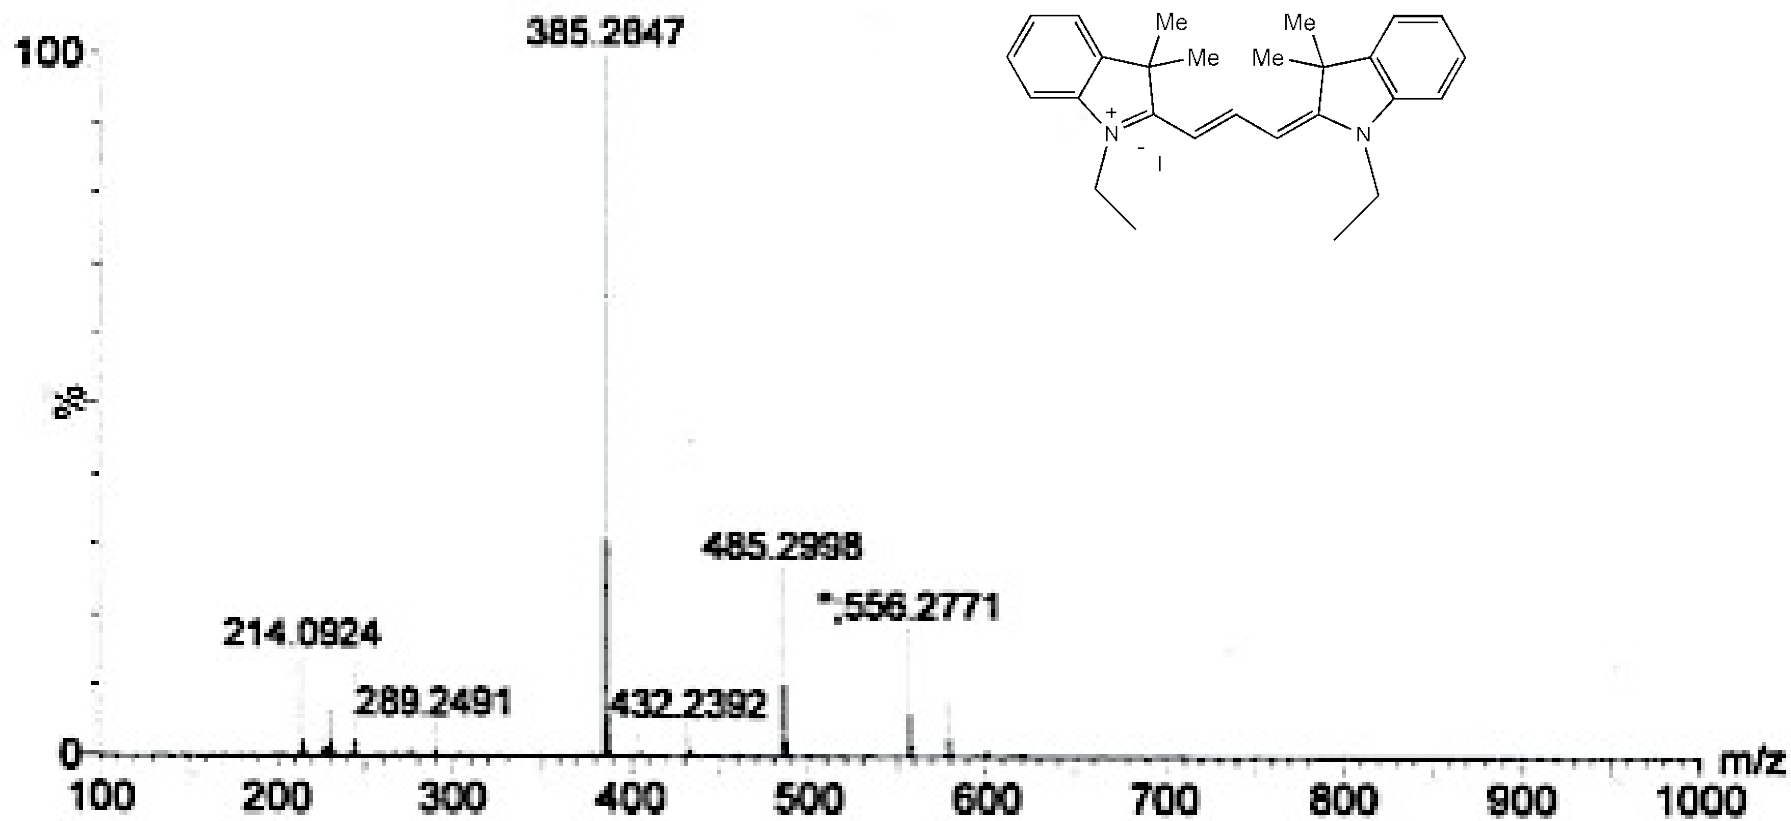



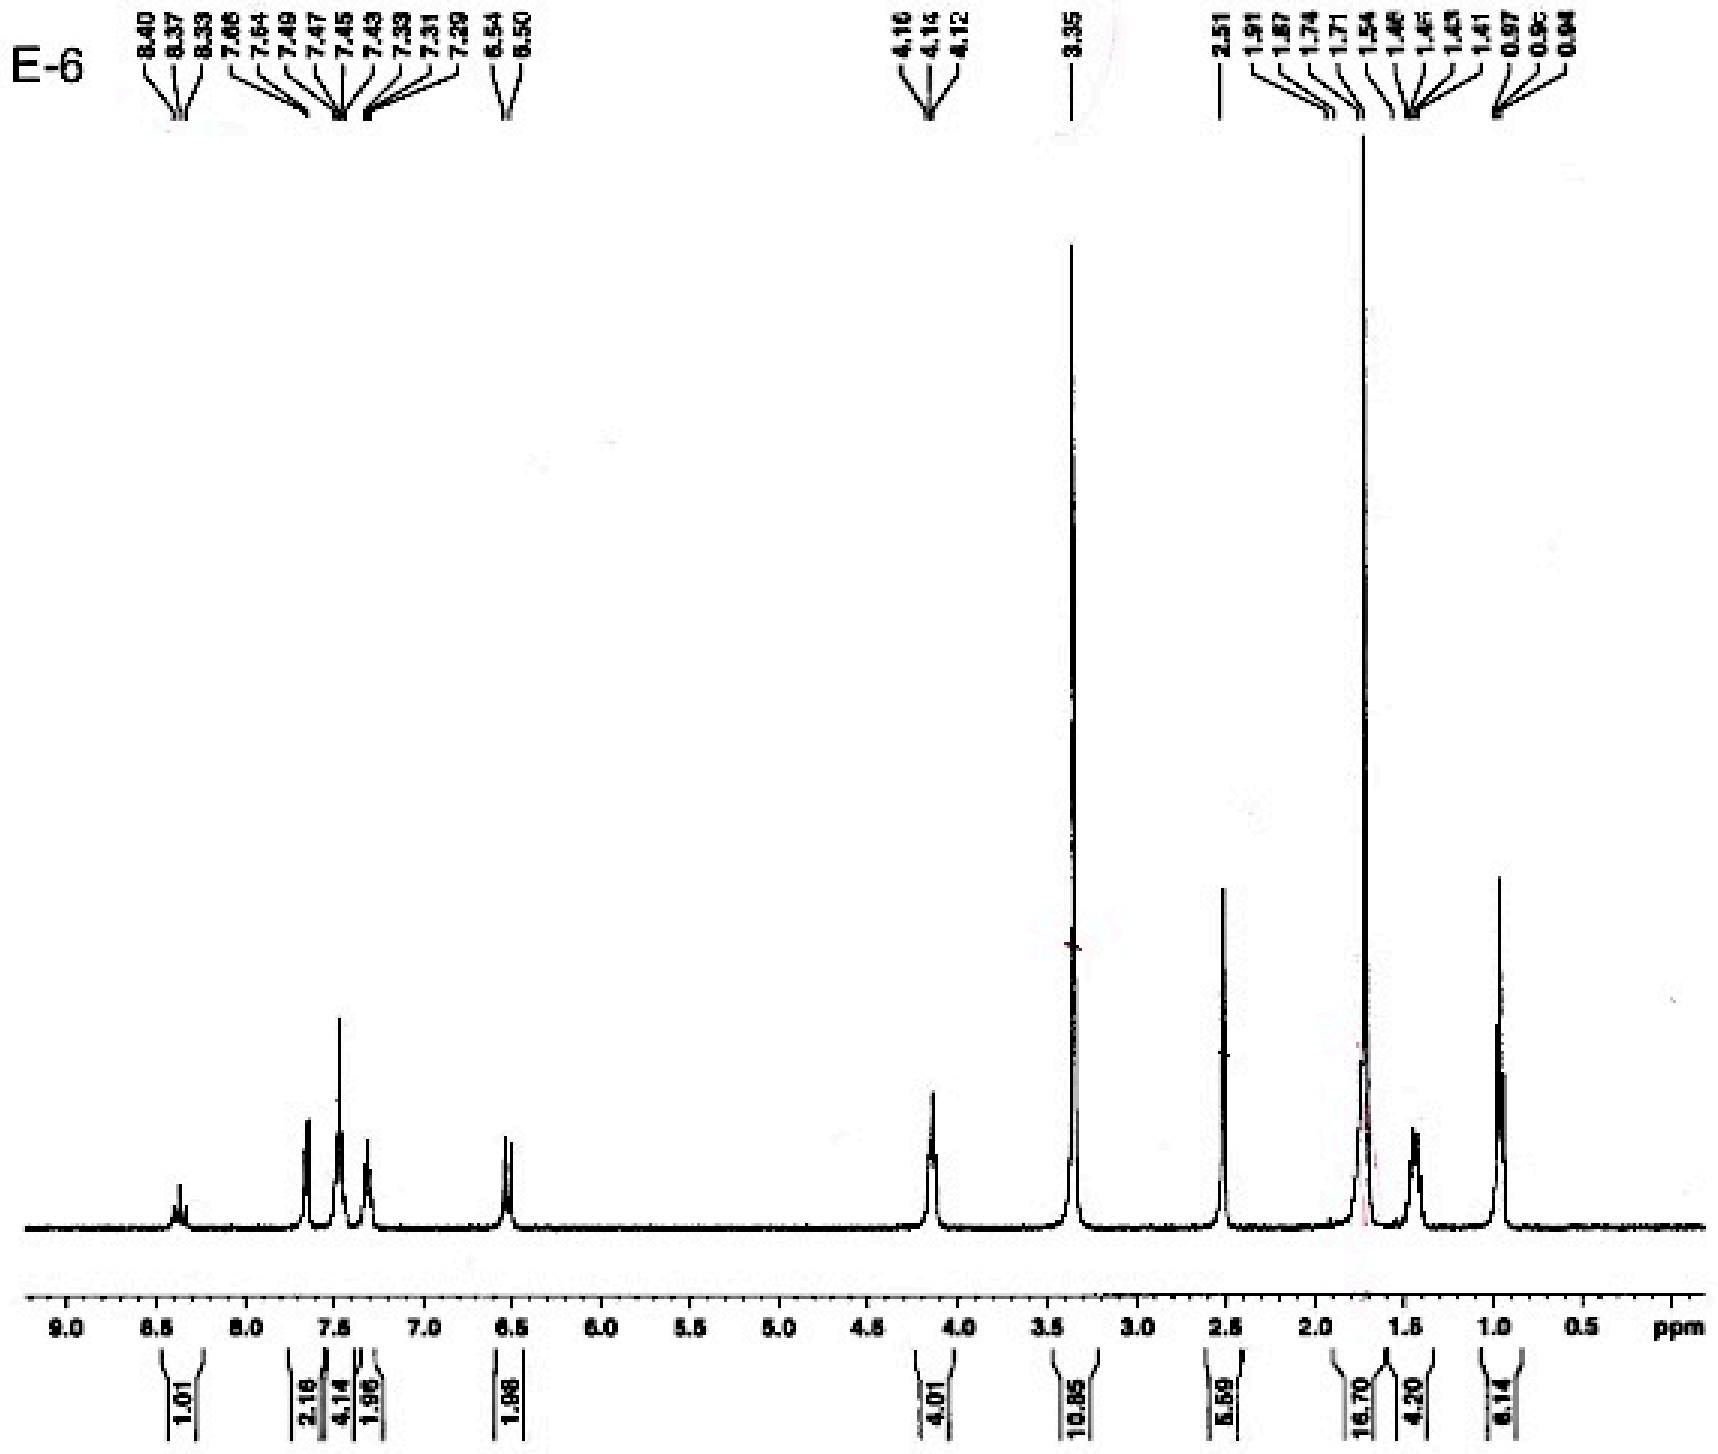



E-6

173.84

141.87

140.51

128.64

125.20

122.50

111.56

102.50

48.90

43.70

28.23

27.46

19.57

13.81

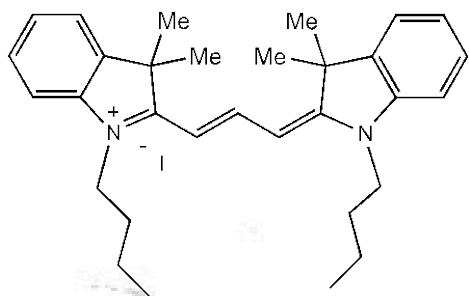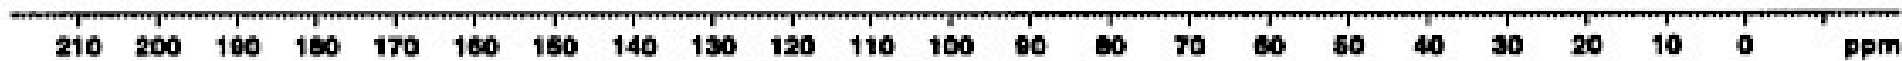

E-6

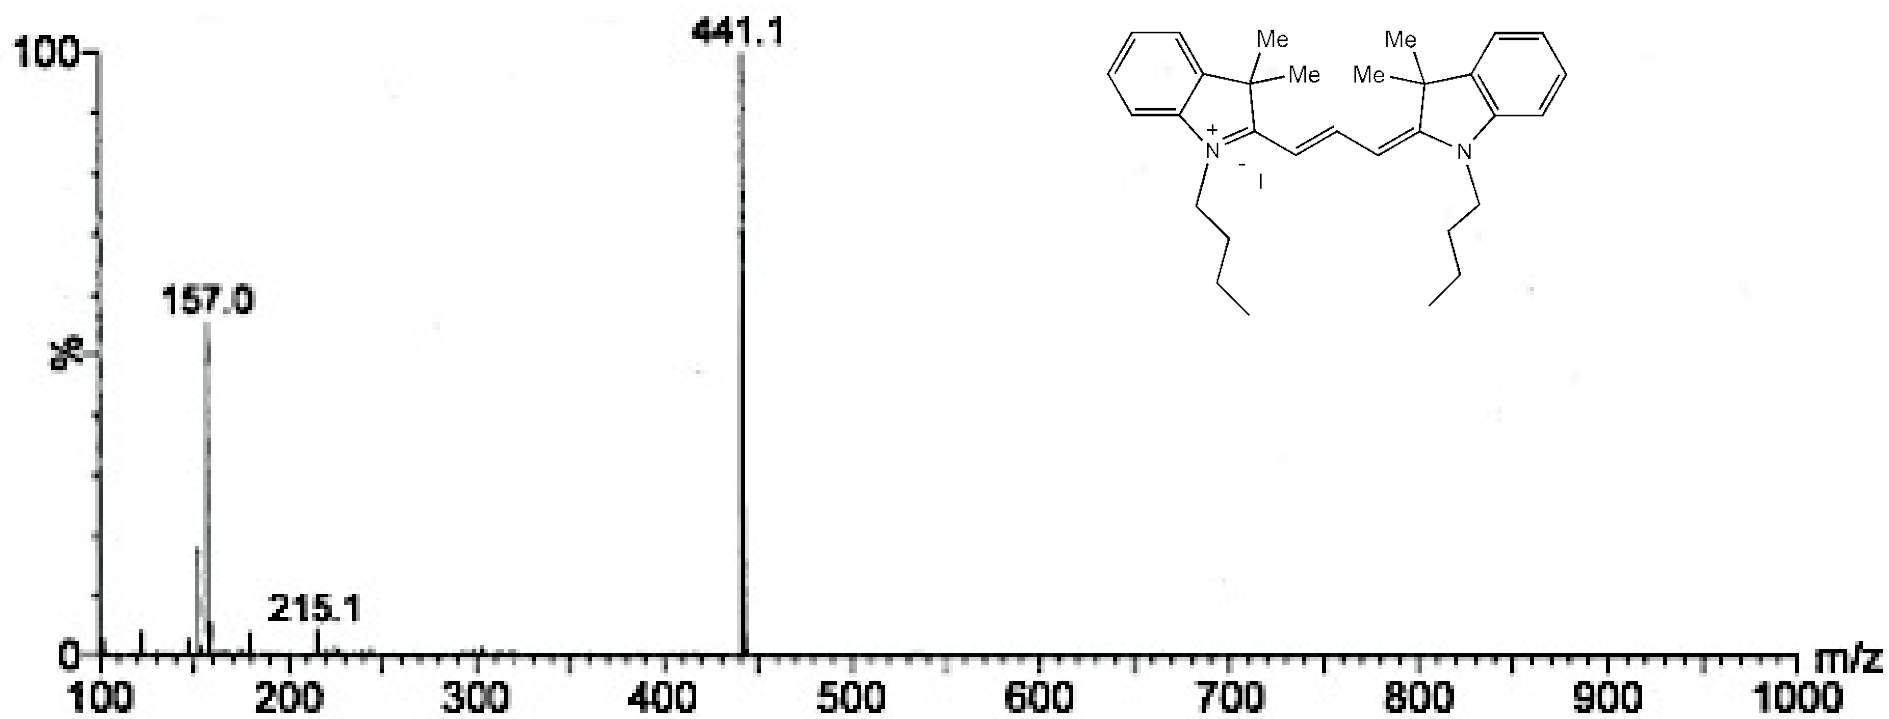



E-4

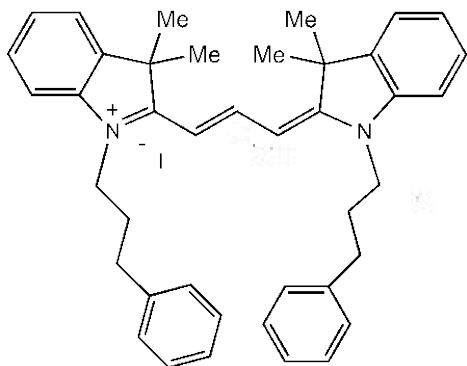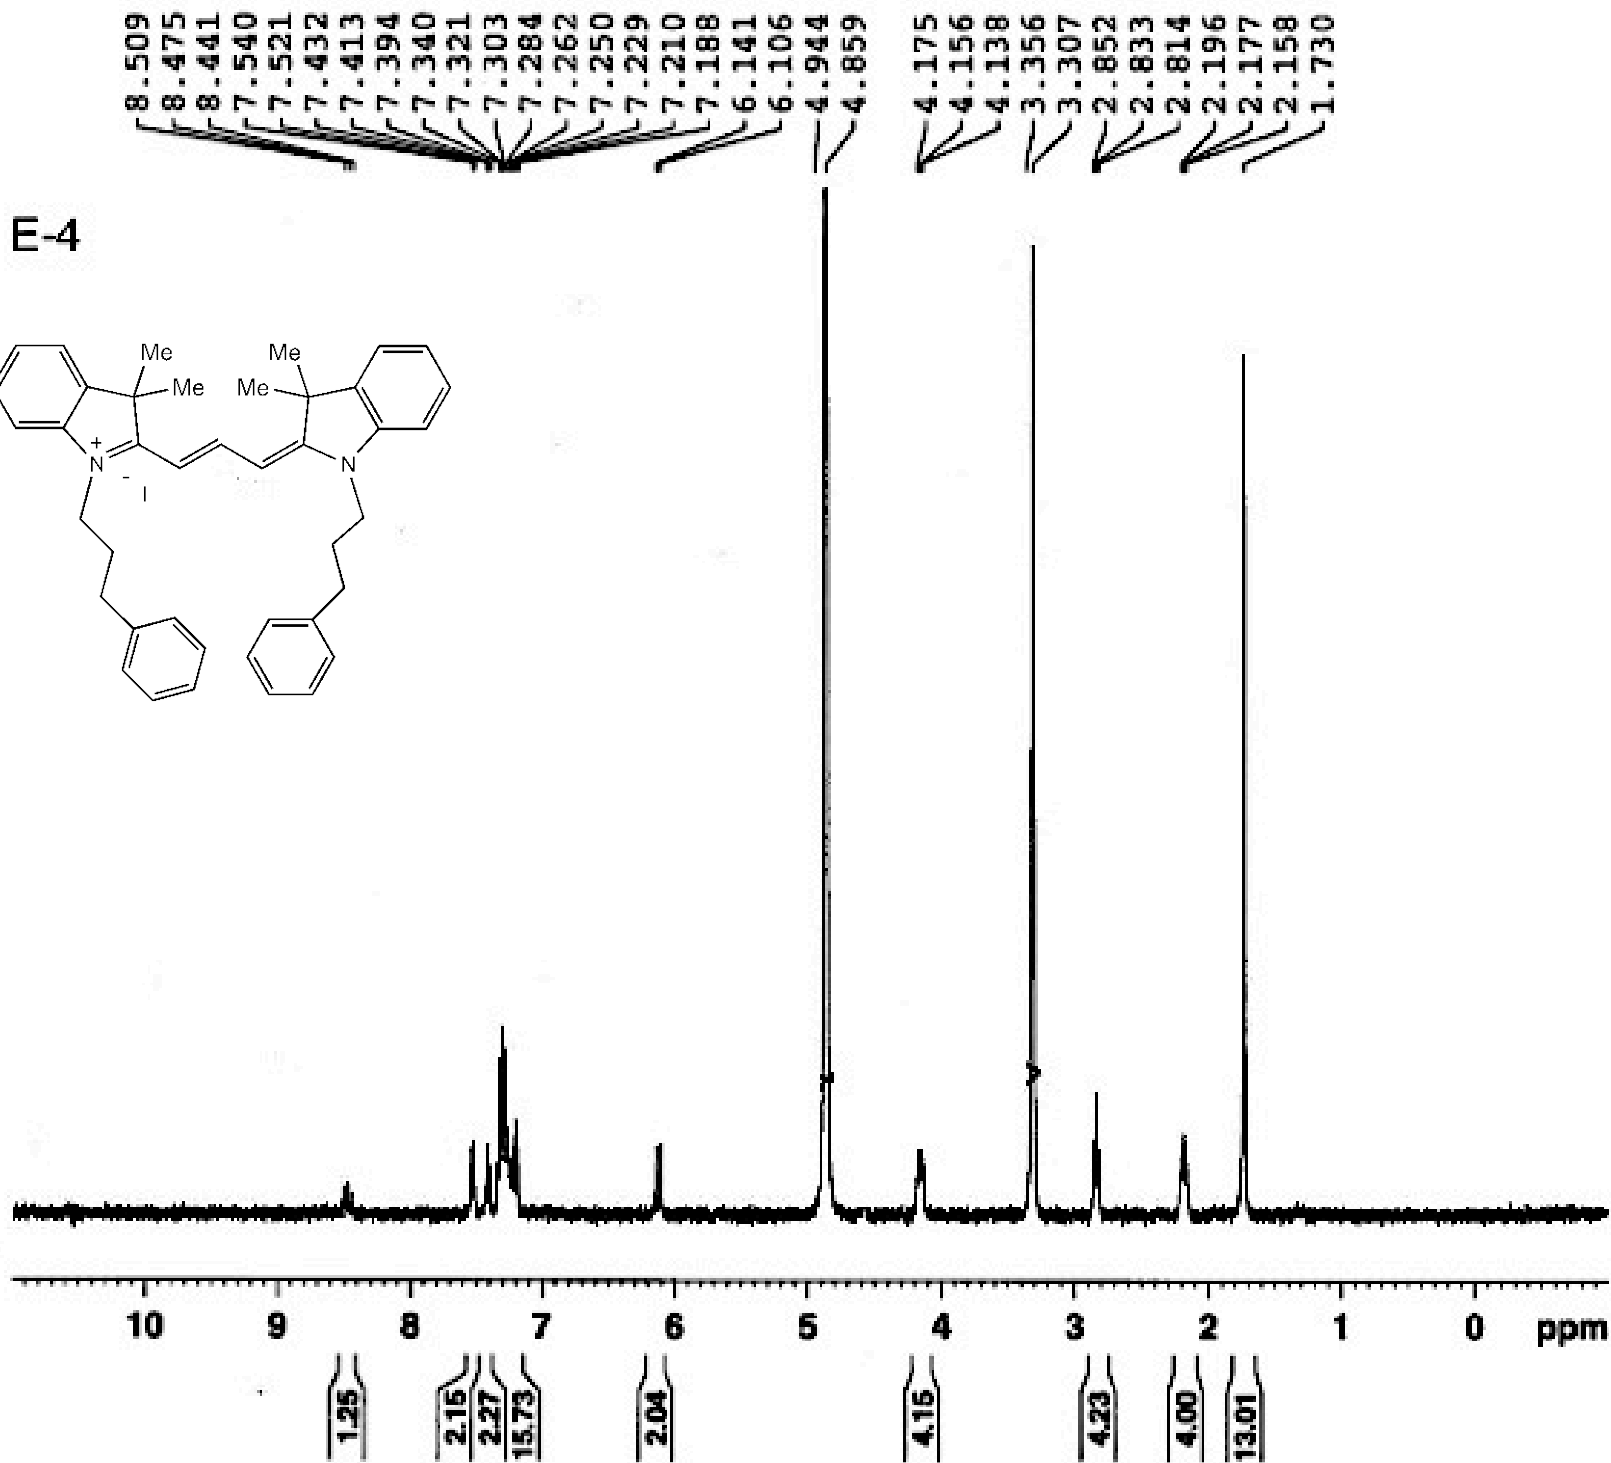



E-4

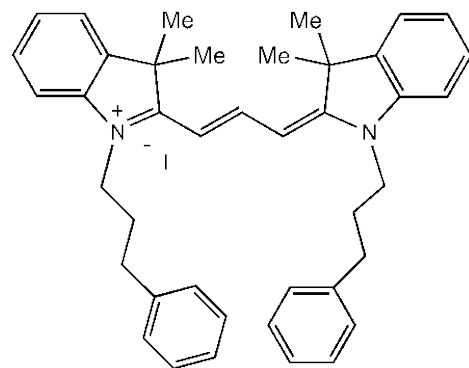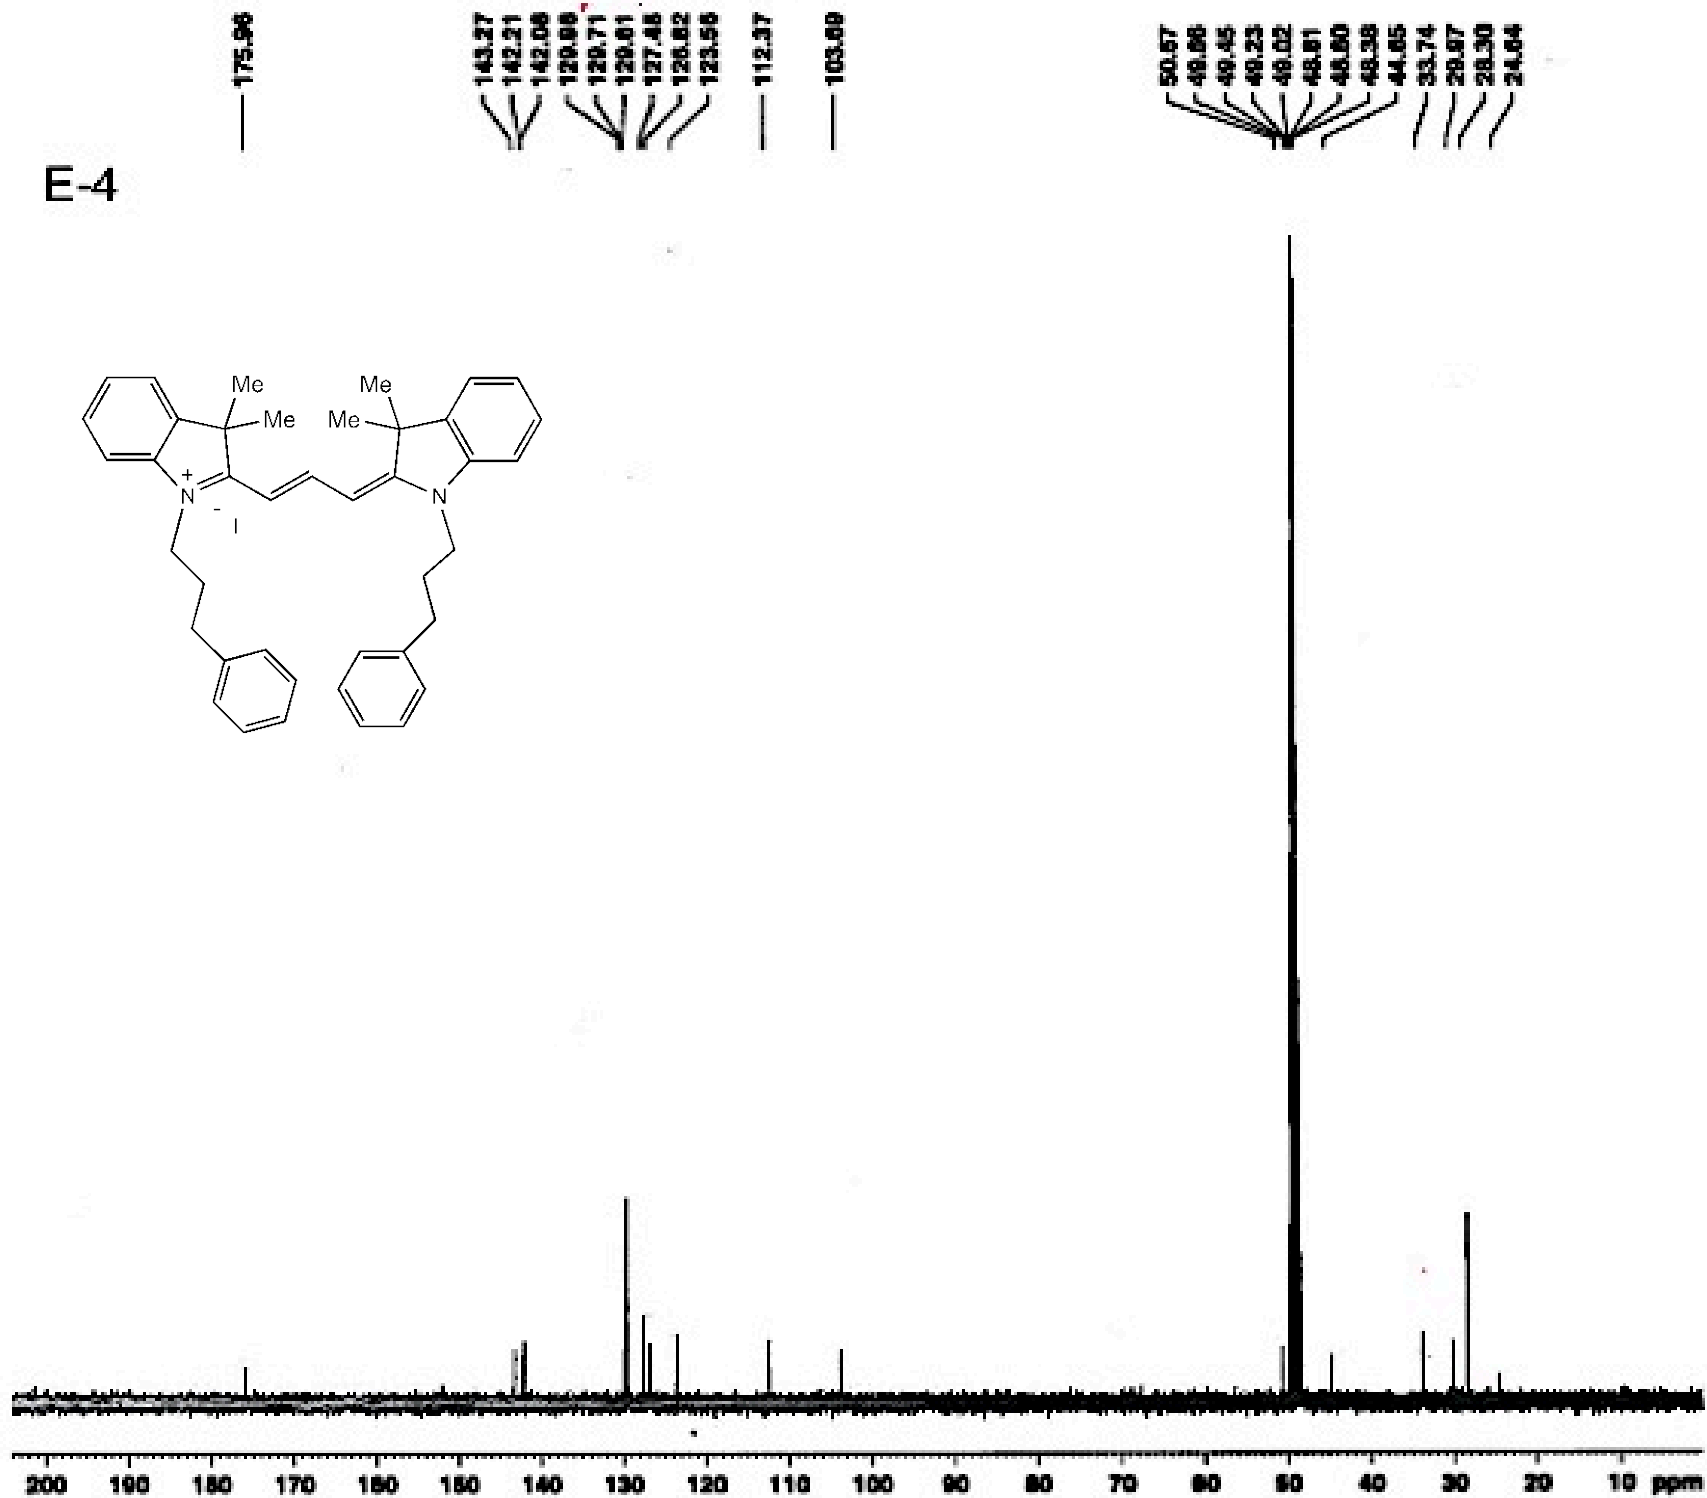

E-4

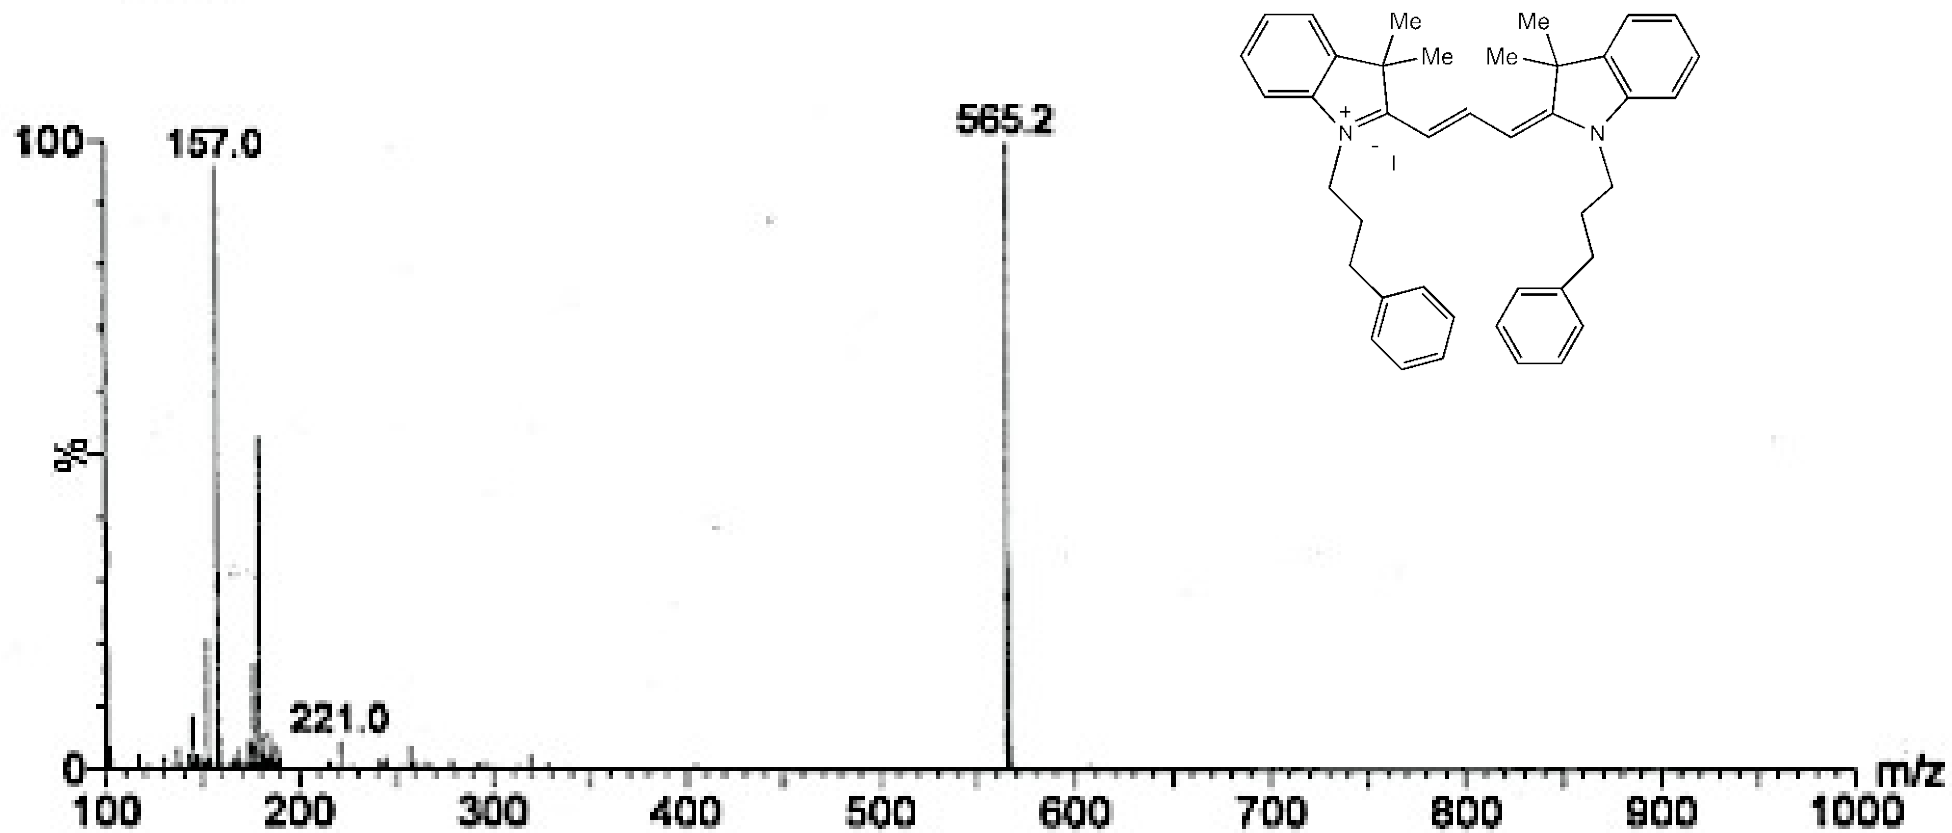

8.79  
 8.79  
 8.76  
 8.91  
 8.28  
 8.06  
 8.05  
 8.04  
 8.02  
 7.70  
 7.68  
 7.66  
 7.64  
 7.54  
 7.53  
 7.51  
 6.55  
 6.51

4.86  
 4.35  
 4.34  
 4.32  
 3.31  
 2.10  
 1.82  
 1.50  
 1.48  
 -0.00

E-5

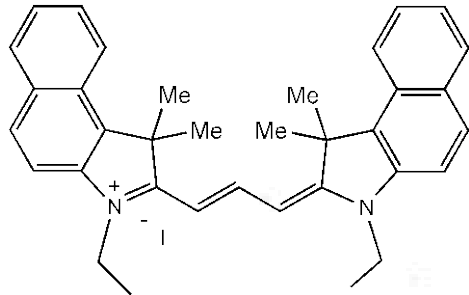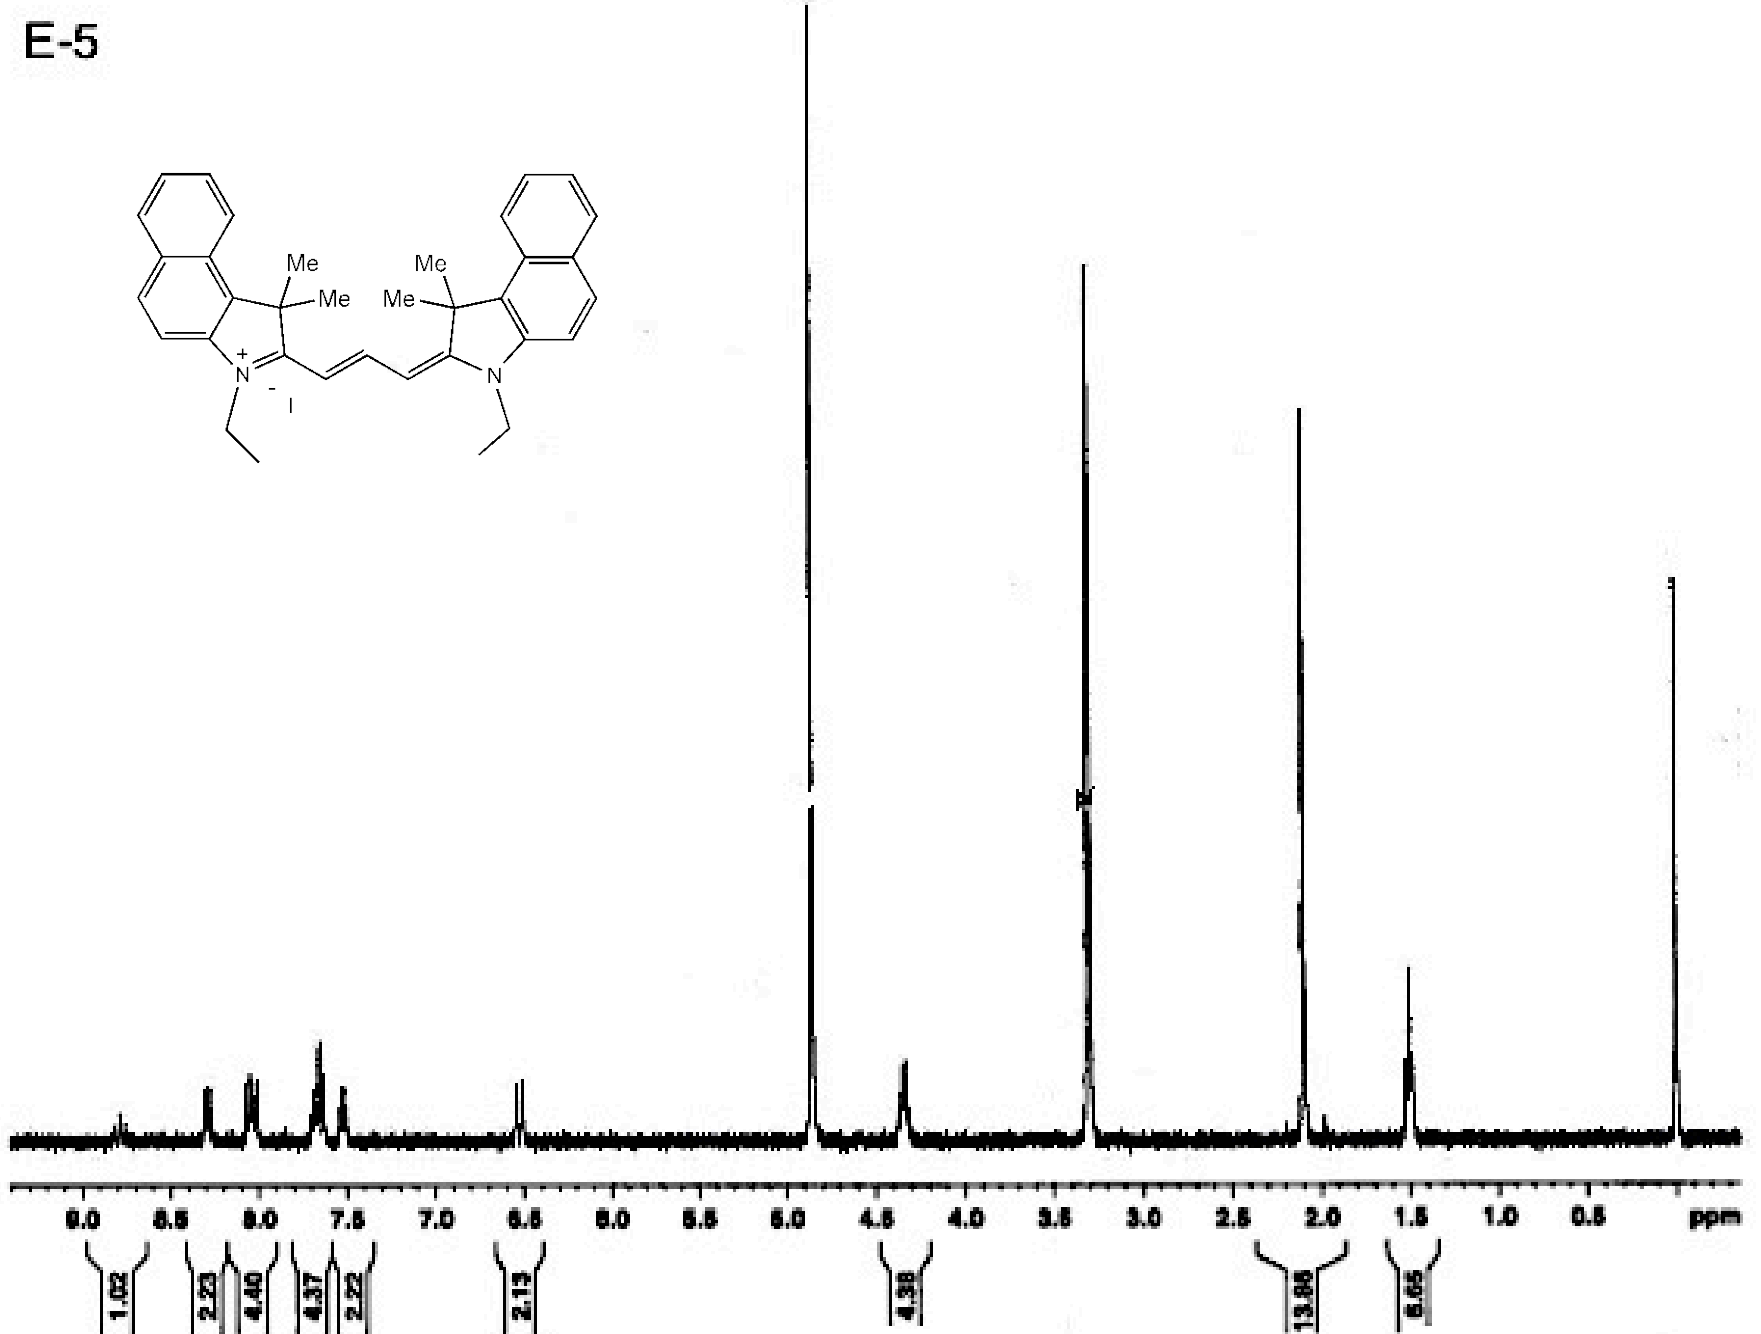

177.13

140.59

133.82

132.16

131.34

129.55

129.07

126.49

123.49

112.14

102.96

52.59

49.79

49.56

49.39

49.15

48.04

48.72

48.51

40.66

28.07

13.13

E-5

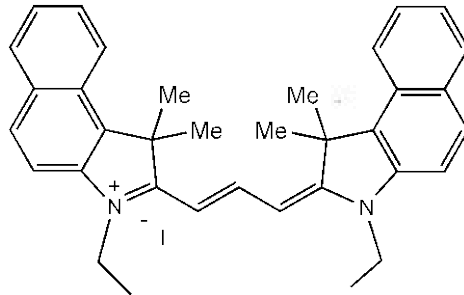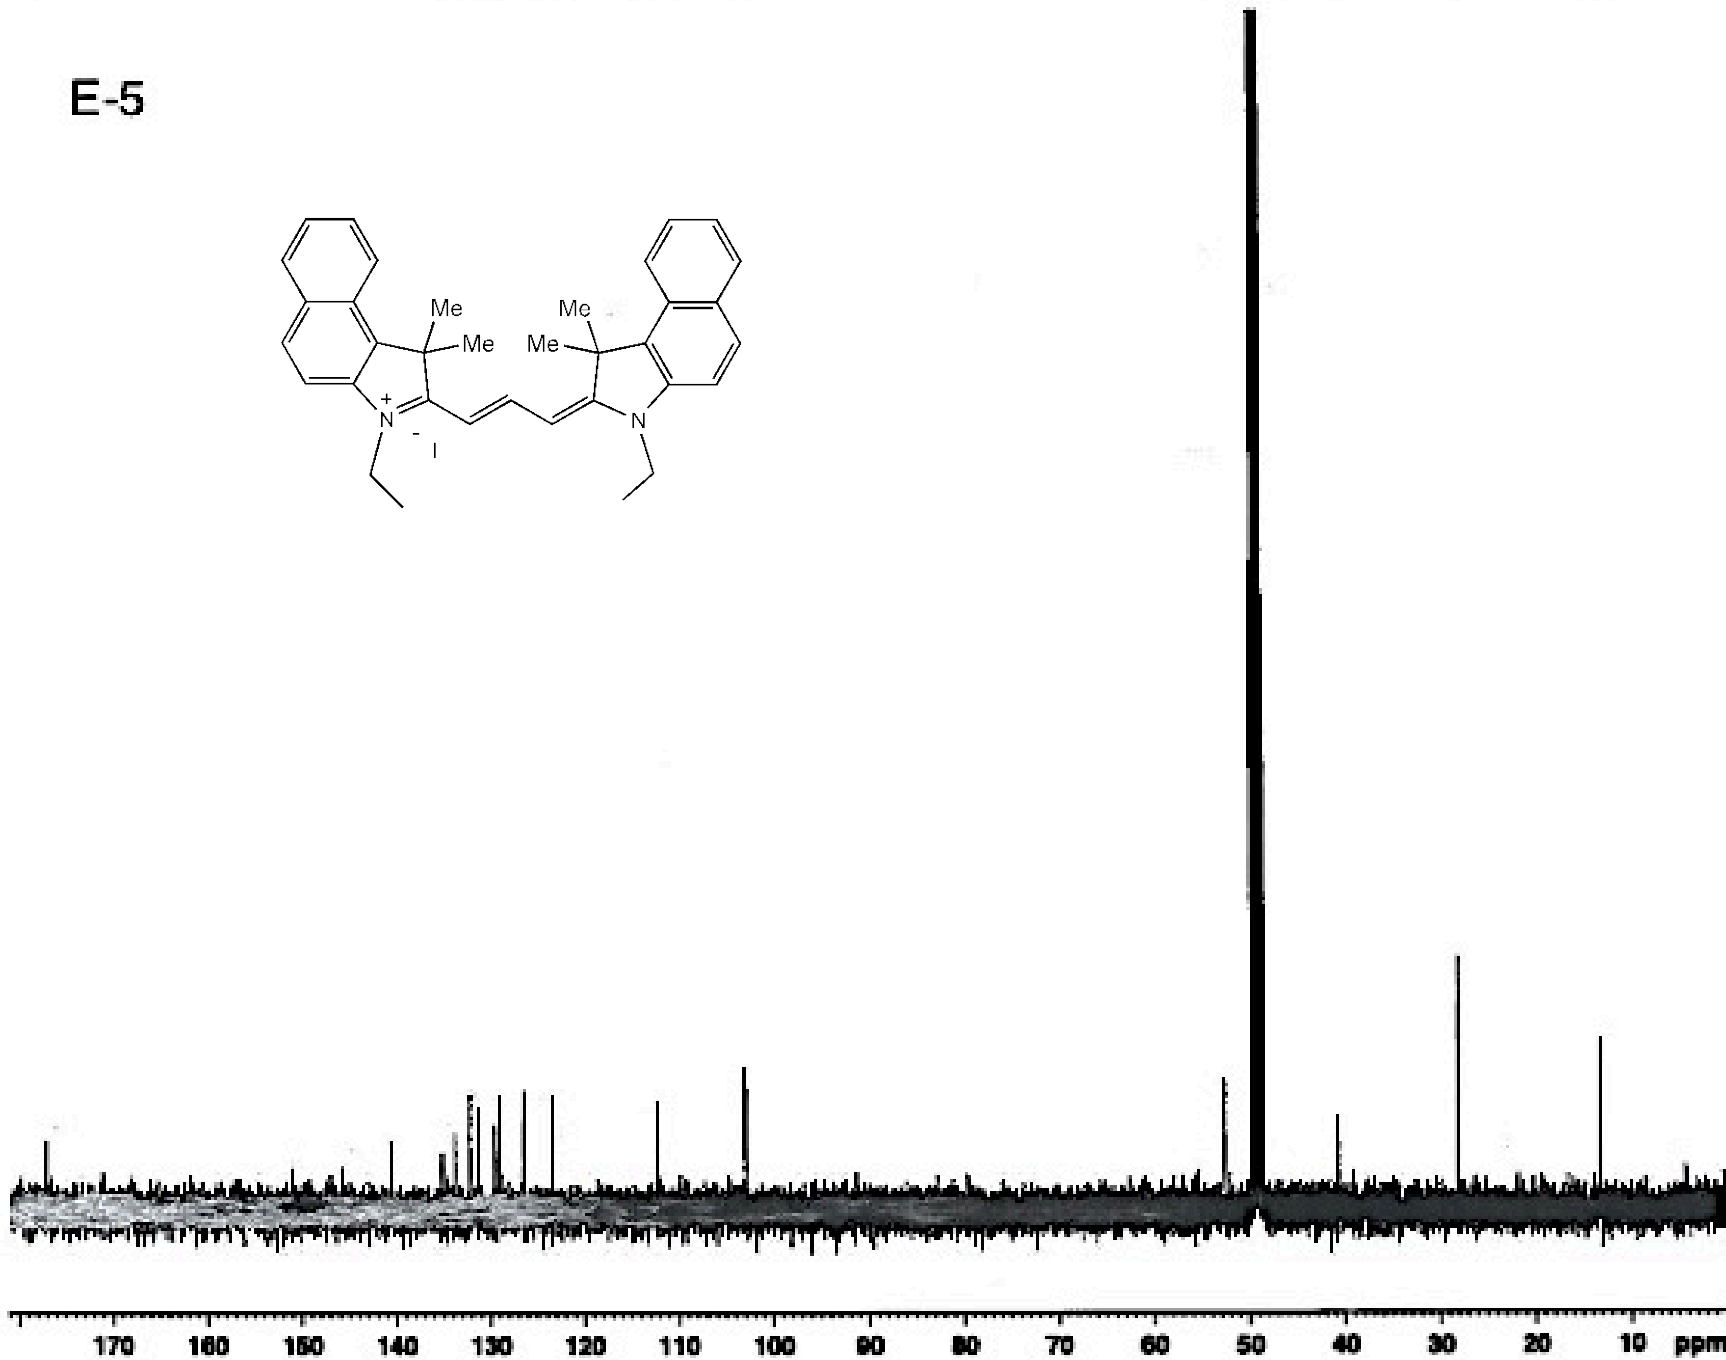

170 160 150 140 130 120 110 100 90 80 70 60 50 40 30 20 10 ppm

E-5

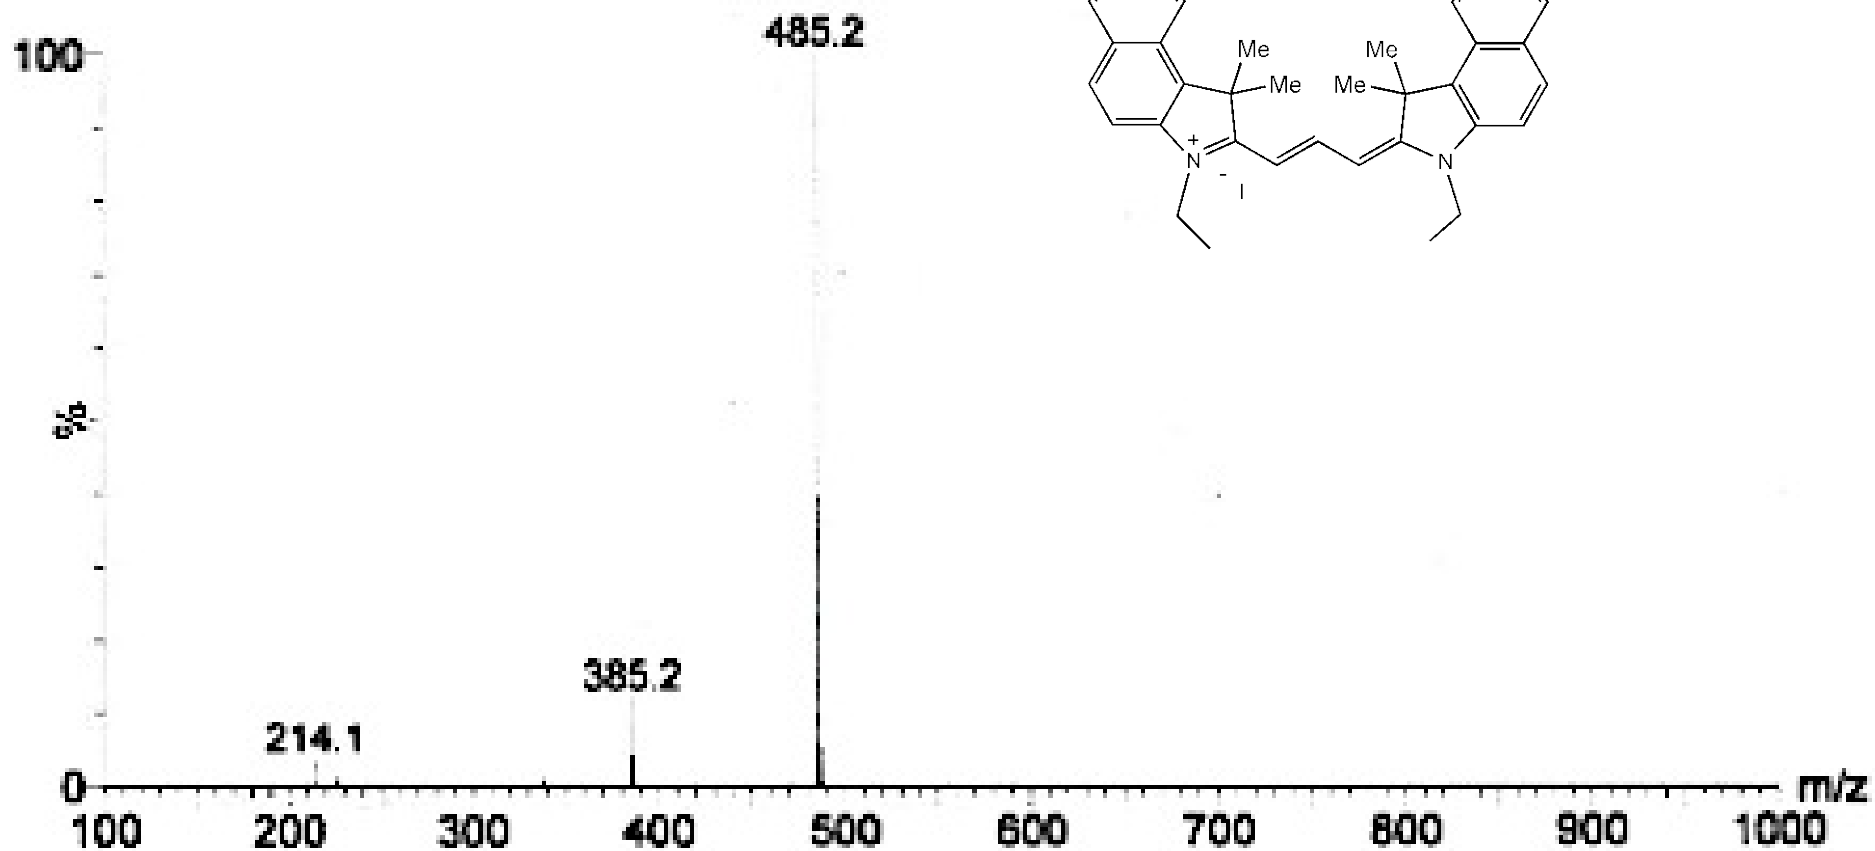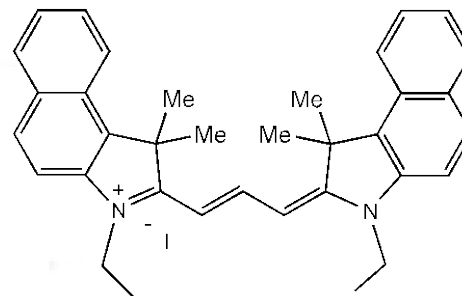

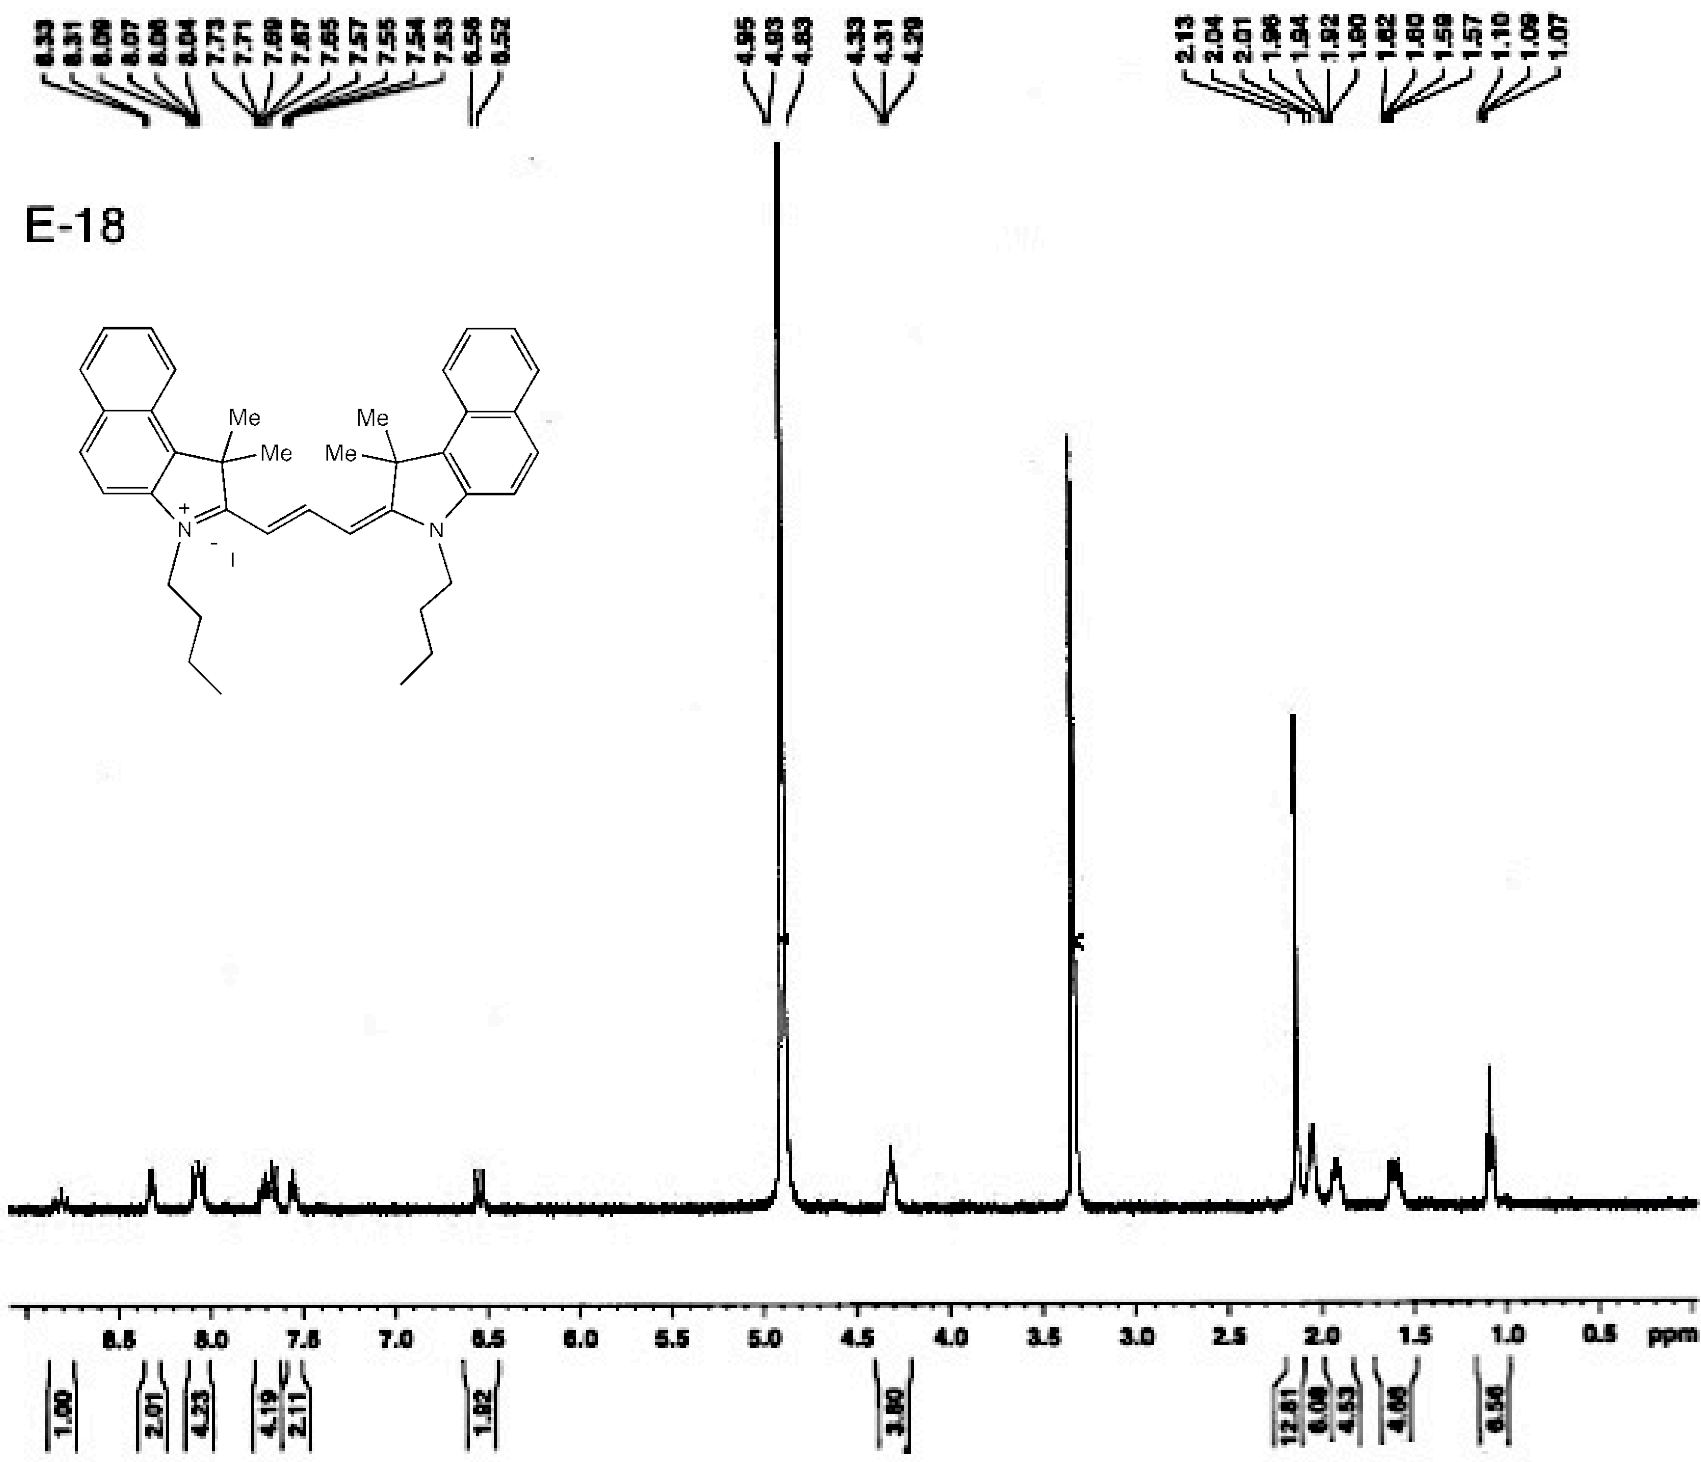

141.02  
135.10  
133.80  
132.10  
131.34  
129.48  
129.09  
126.52  
123.50

113.37

103.27

52.56  
49.79  
49.58  
49.36  
49.15  
48.94  
48.72  
48.51

31.13  
28.18

21.38  
21.11

14.41

E-18

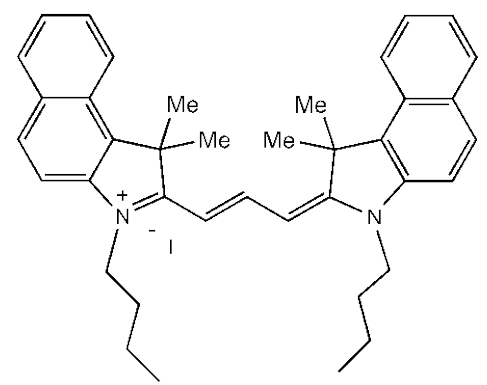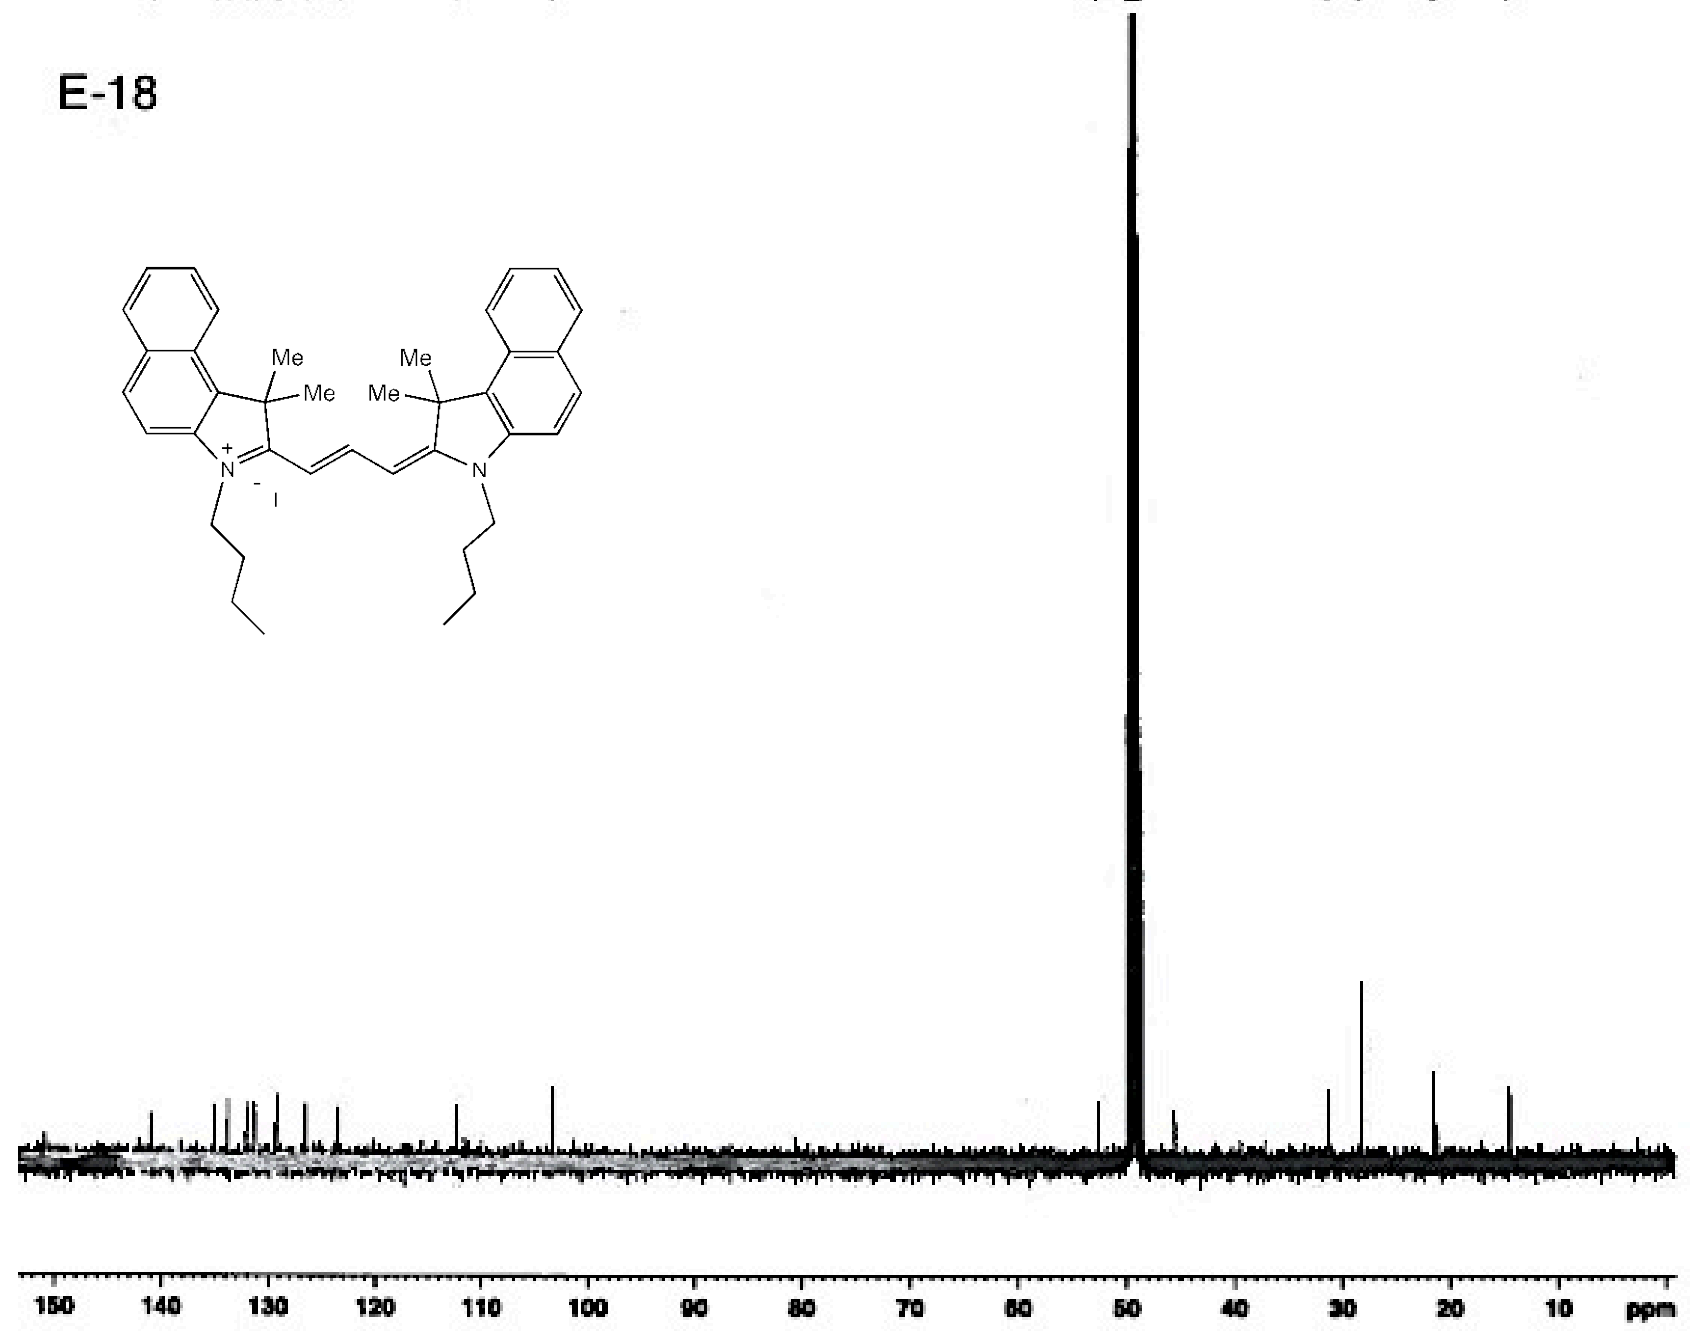

150 140 130 120 110 100 90 80 70 60 50 40 30 20 10 ppm

E-18

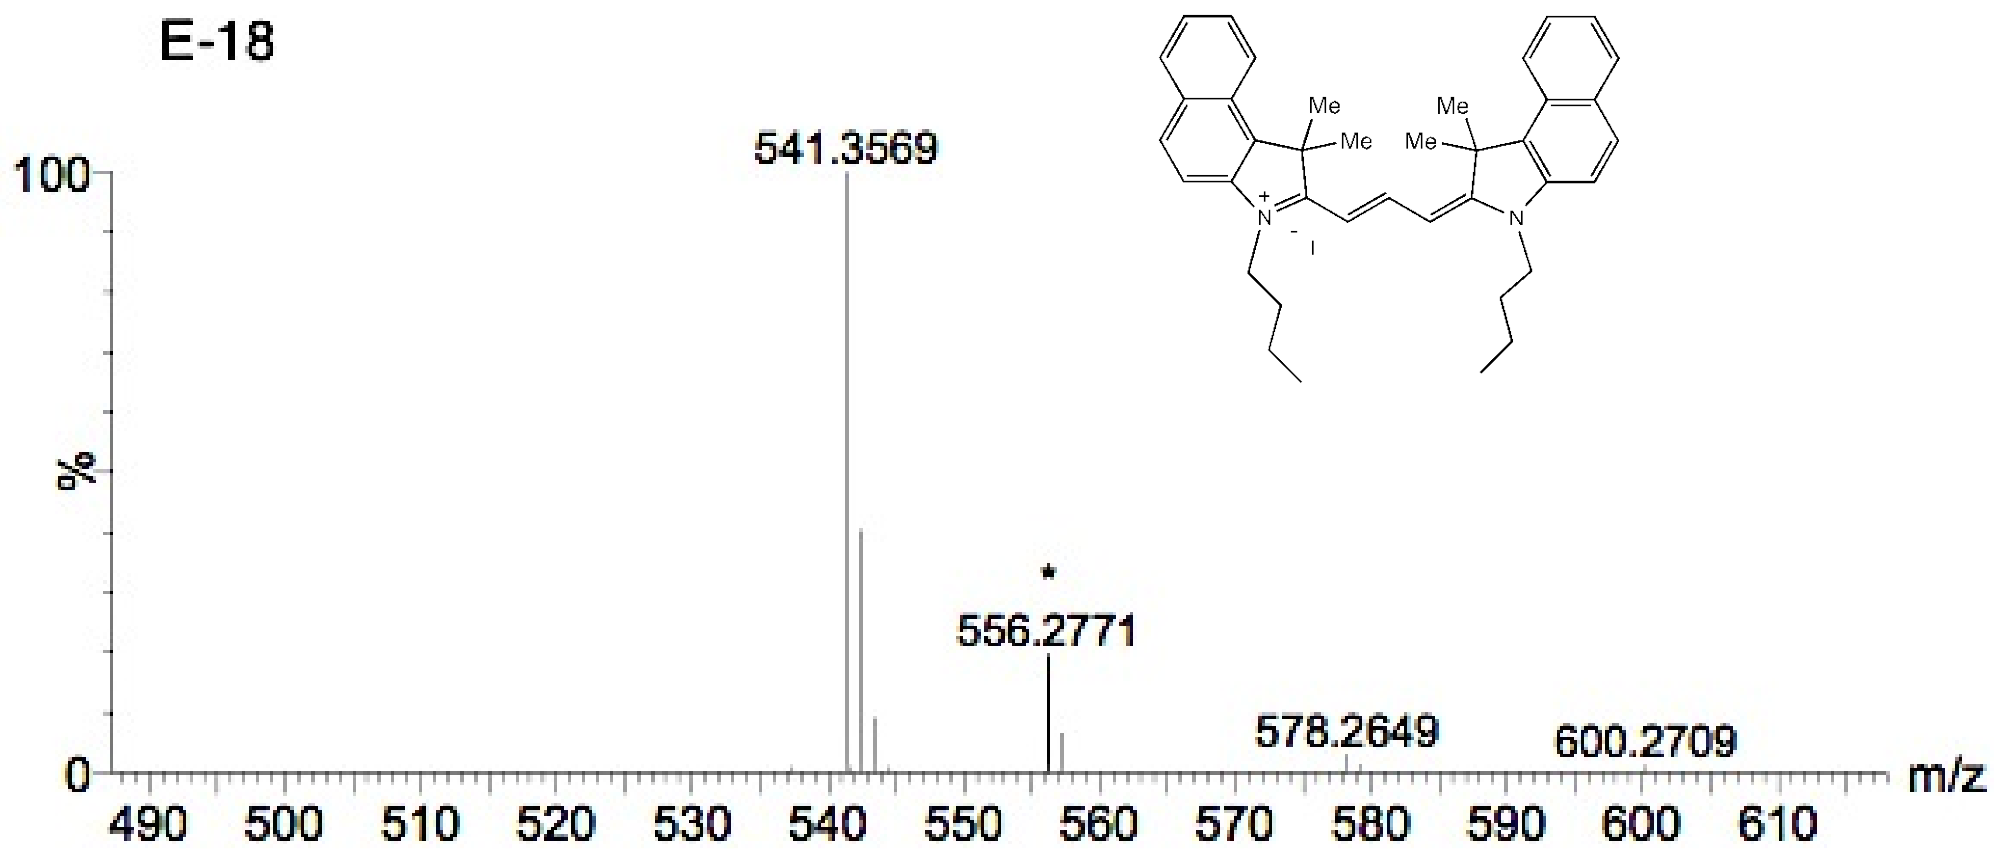





8.62 8.58 8.55 8.51 8.29 8.13 8.11 8.09 7.76 7.74 7.72 7.70 7.68 7.57 7.55 7.53 7.33 7.31 7.29 7.25 7.24 7.23 7.21 6.51 6.47 4.35 4.33 3.82 3.82 3.73 3.71 3.68 3.62 3.58 3.53 3.48 3.48 3.41 3.36 3.29 3.27 3.25 3.24 3.21 3.20 3.18 3.17 3.16 2.86 2.84 2.82 2.81 2.22 2.18 2.14 2.01 1.96 1.89

11-8

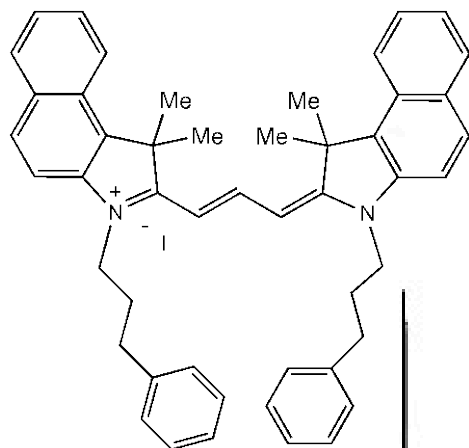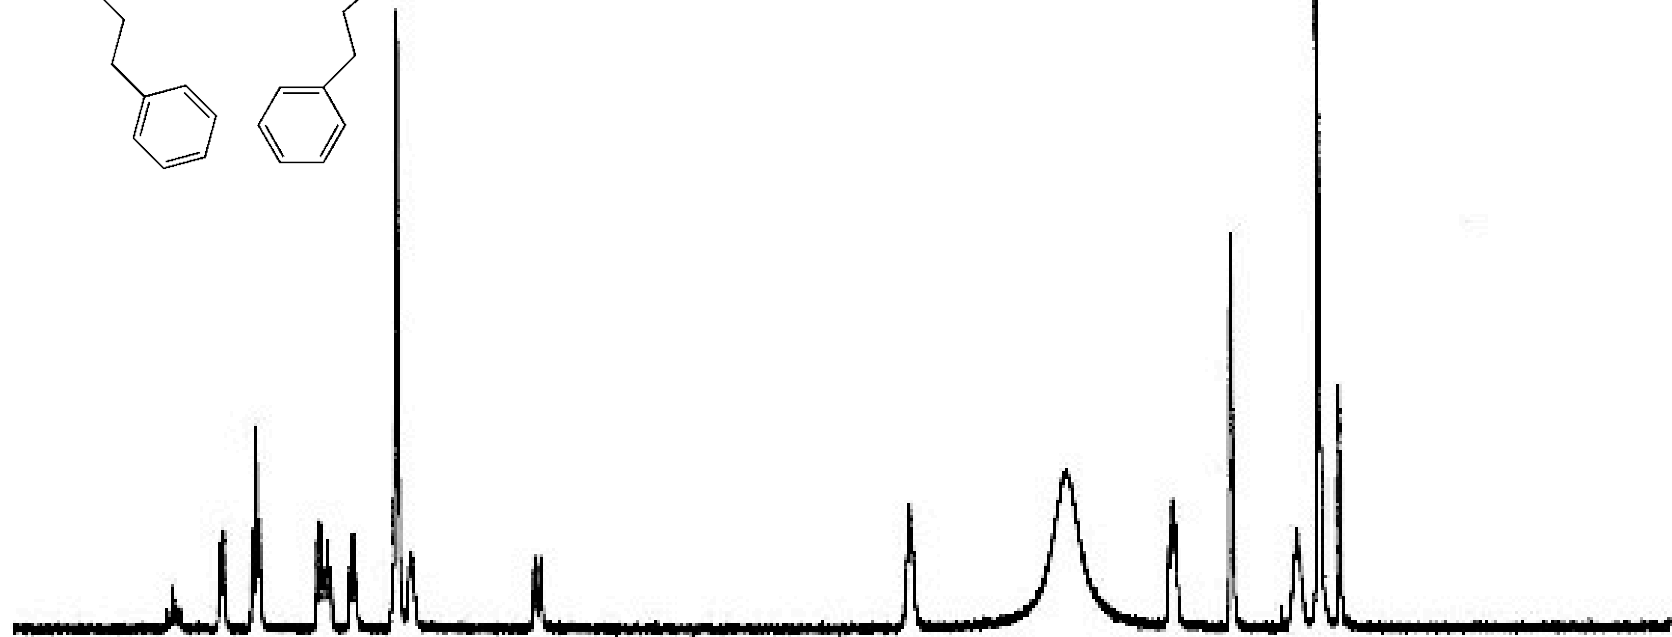

9.0 8.5 8.0 7.5 7.0 6.5 6.0 5.5 5.0 4.5 4.0 3.5 3.0 2.5 2.0 1.5 1.0 0.5 ppm

1.00 2.18 4.48 4.41 2.20 8.86 2.64 2.16 4.33 90.52 4.85 6.52 4.46 13.37 2.69

E-8

140.62  
139.23  
132.27  
130.55  
129.75  
128.34  
126.21  
126.07  
121.59  
121.50  
121.59  
126.06  
125.01  
121.02  
110.65  
101.59

32.32  
28.75  
26.60

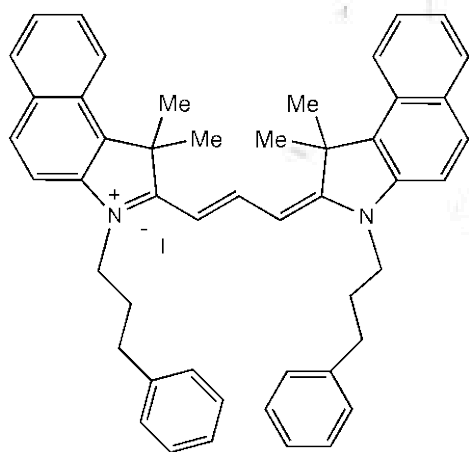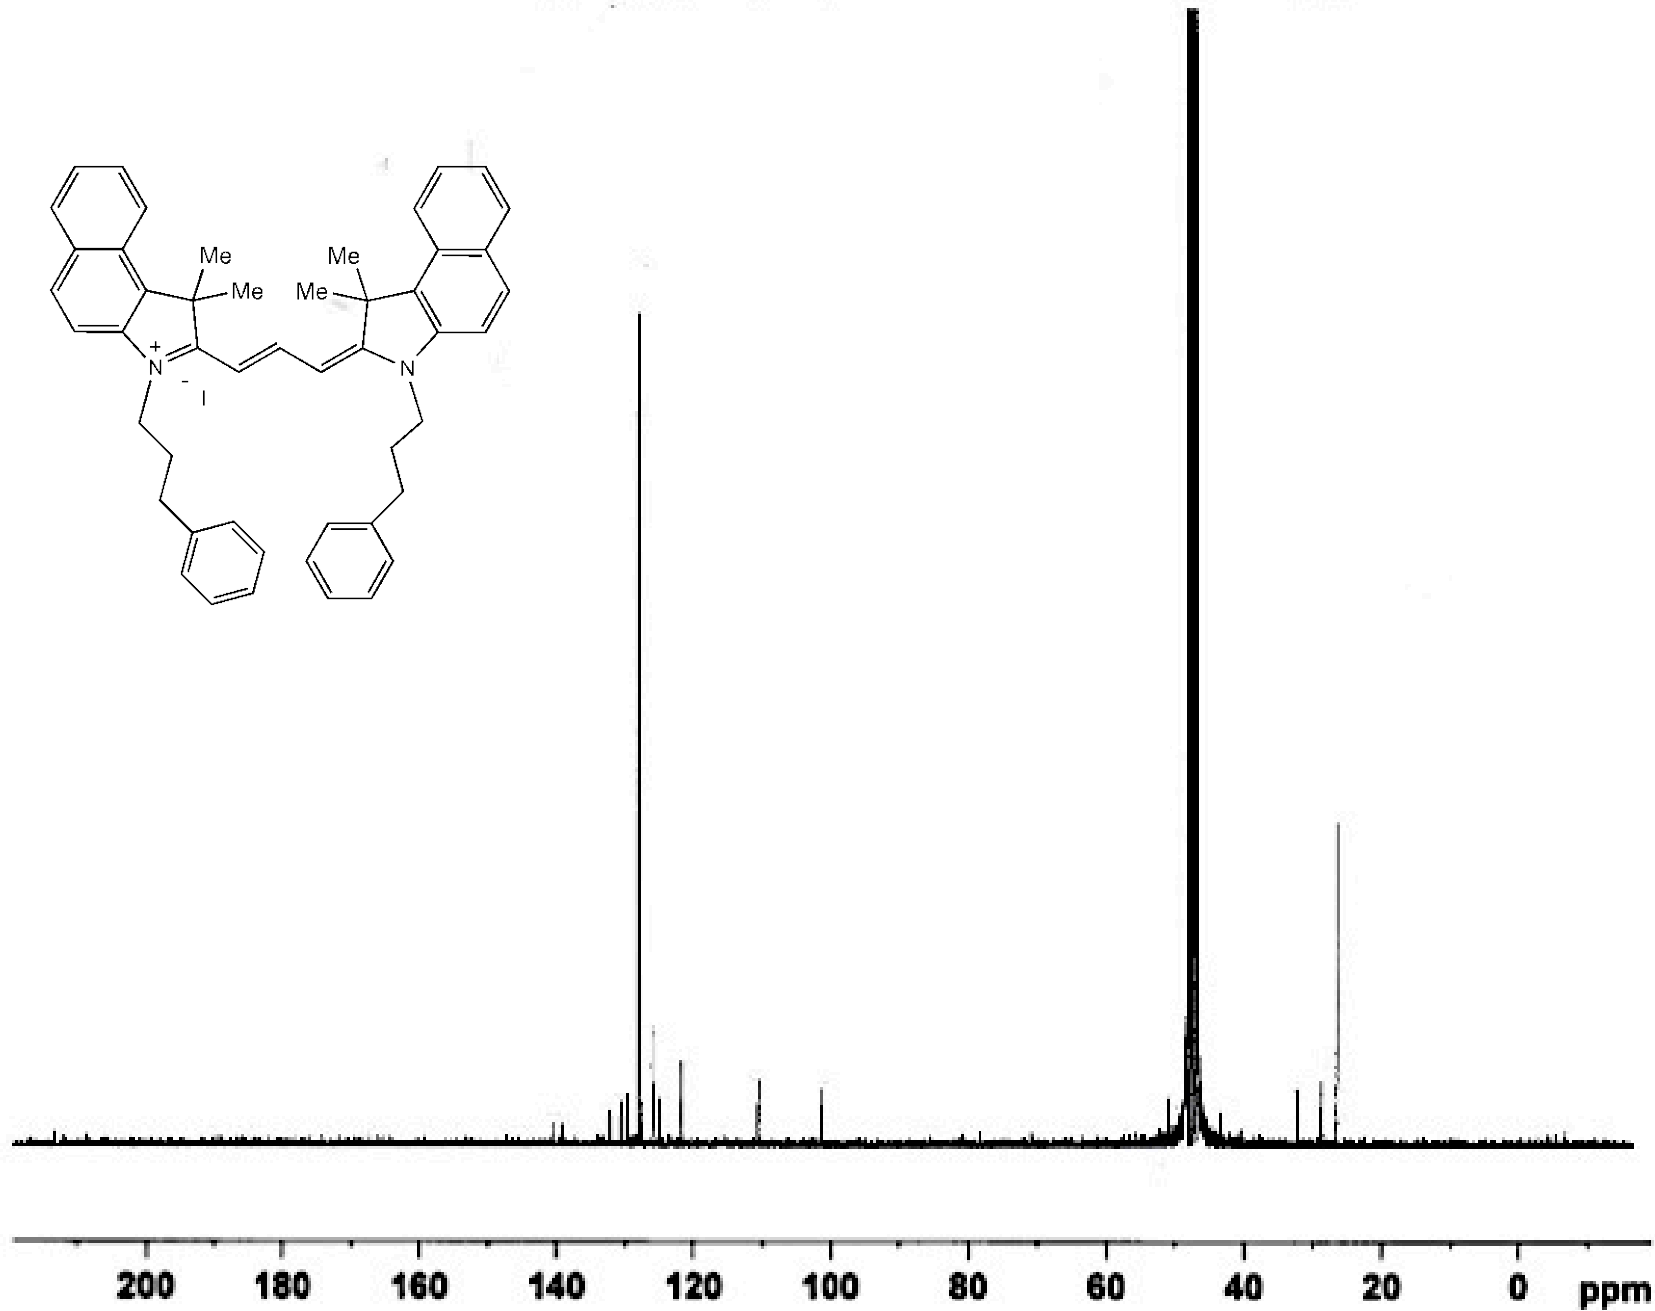

E-8

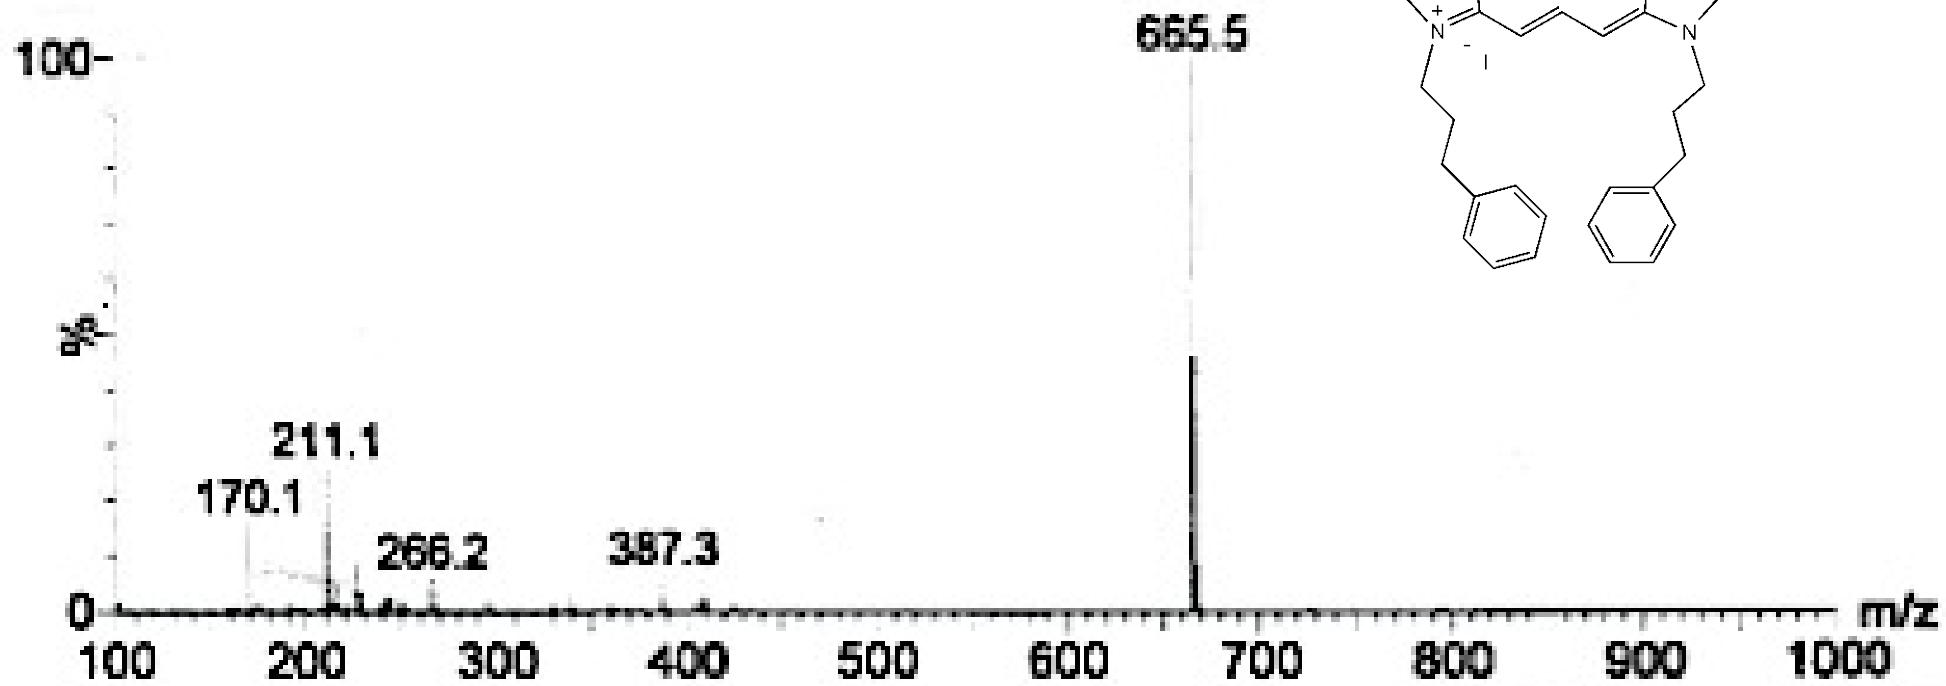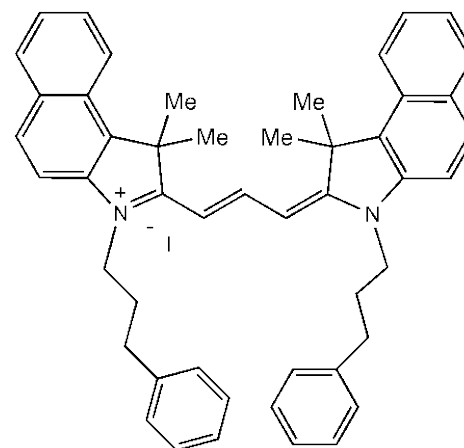

Supplement: NIHMS619223-supplement-suppl.pdf [file NIHMS619223-supplement-suppl.pdf]
